# Supplementary material for: Zn(ii) and Co(ii) coordination polymers based on semi-rigid bis-pyridyl-bis-amide and angular dicarboxylate ligands: synthesis, structures and properties
Source: Royal Society of Chemistry journal article supplement (doi:10.1039/d2ce00826b), 2022-01-01
Supplement: d2ce00826b1.pdf [file d2ce00826b1.pdf]

## Supplementary materials

### **Zn(II) and Co(II) coordination polymers based on semi-rigid bis-pyridyl-bis-amide and angular dicarboxylate ligands: synthesis, structures and properties**

Venkatesan Lakshmanan,<sup>a</sup> Chia-Yi Lee,<sup>a</sup> Yu-Wen Tseng,<sup>a</sup>

Yu-Hsiang Liu,<sup>a</sup> Chia-Her Lin<sup>b,\*</sup> and Jhy-Der Chen<sup>a,\*</sup>

<sup>1</sup> Department of Chemistry, Chung-Yuan Christian University, Taoyuan  
City, 320, Taiwan R. O. C;

<sup>2</sup> Department of Chemistry, National Taiwan Normal University, Taipei,  
Taiwan, R. O. C.

**Scheme S1** Structures of selected pesticides.

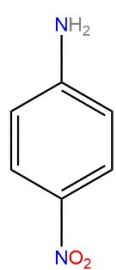

4-NA

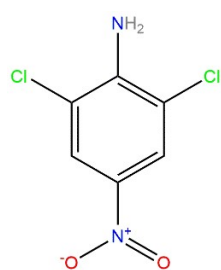

2,6-DCNA

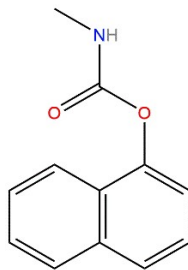

Carbaryl

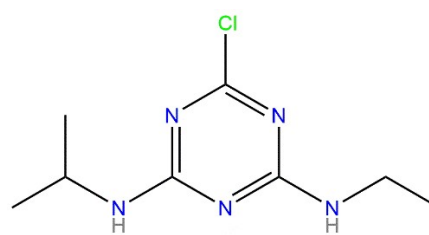

Atrazine

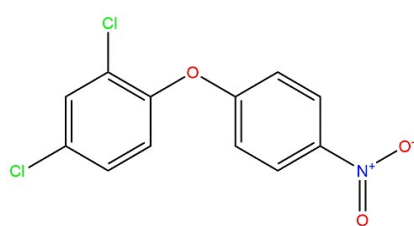

Nitrofen

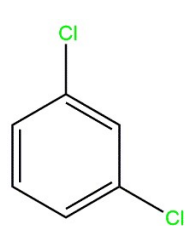

1,3-Dichlorobenzene

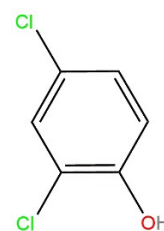

2,4-Dichlorophenol

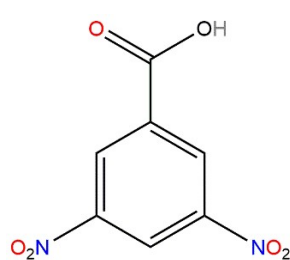

3,5-Dinitrobenzoic acid

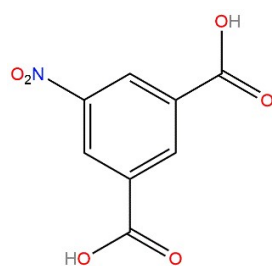

5-Nitroisophthalic acid

**Fig. S1** FT-IR spectra of complexes (a) **1** (b) **2** (c) **3** (d) **4** (e) **5** and (f) **6**.

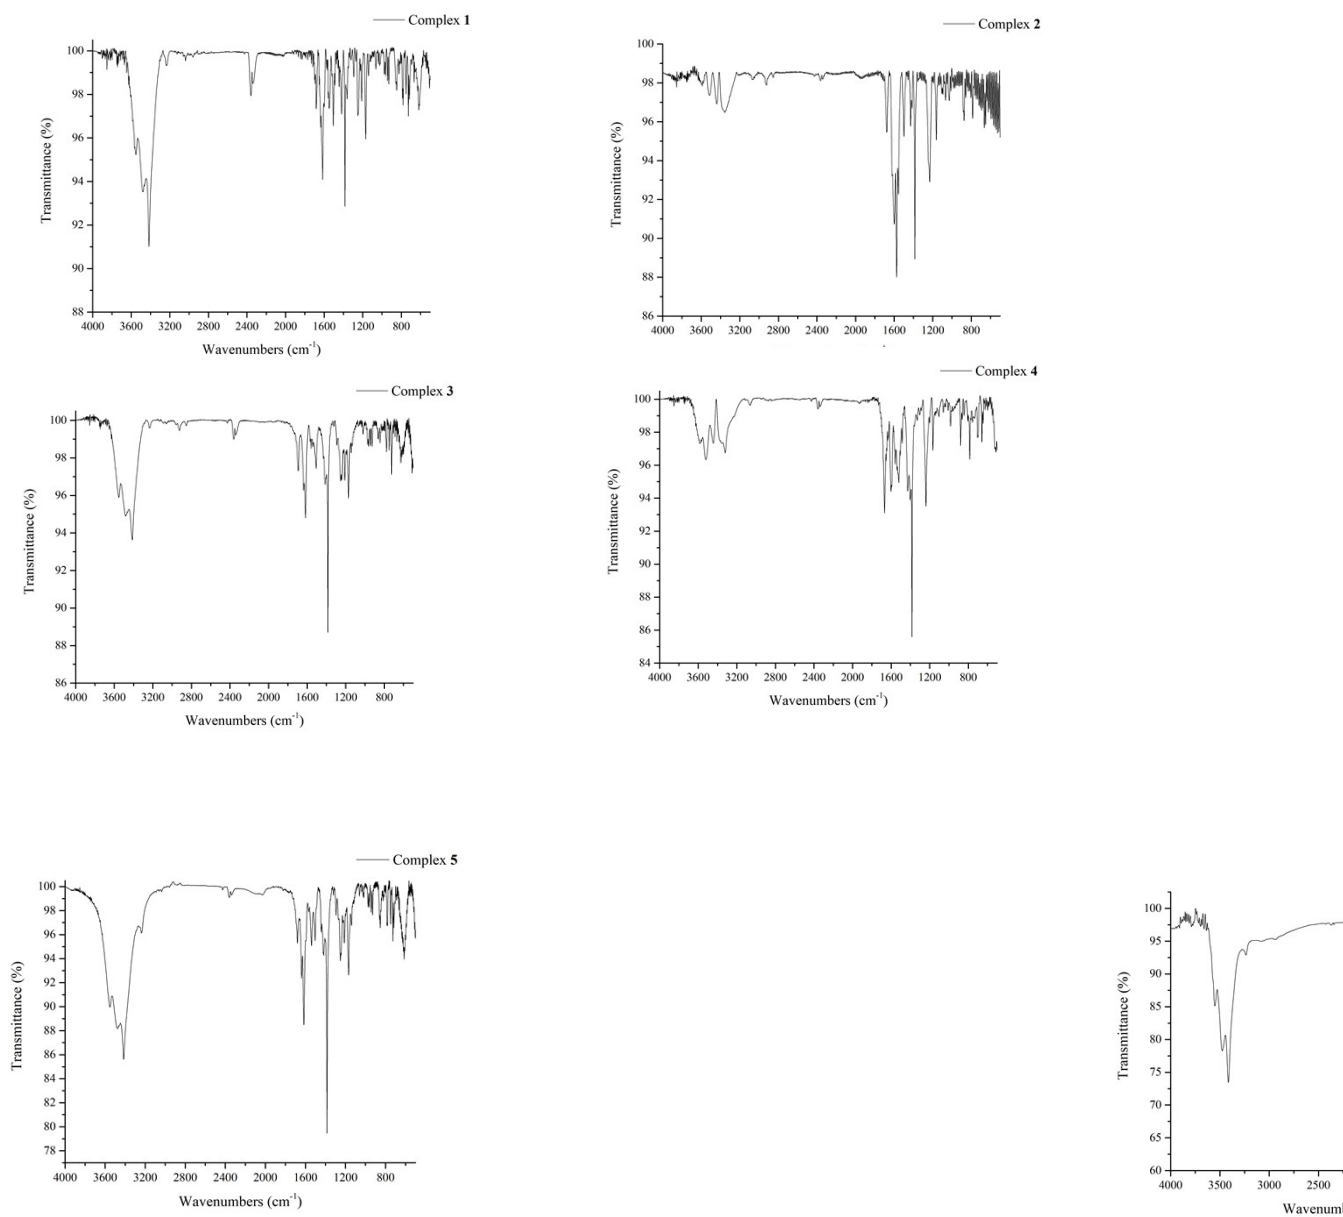

**Fig. S2** (a) Simulated and (b) as synthesized PXRD patterns of complex **1**.

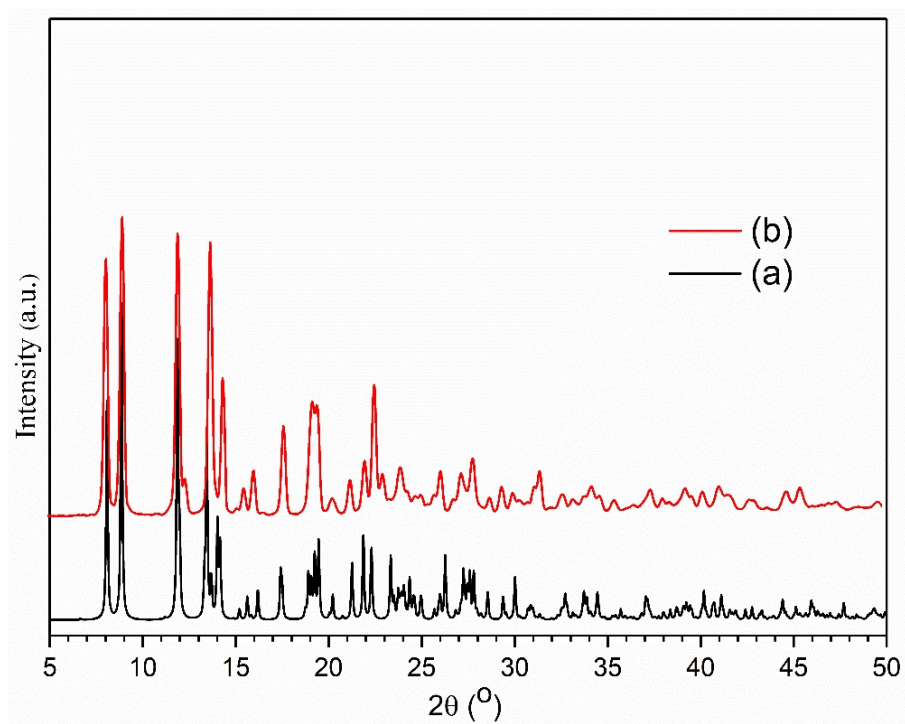

**Fig. S3** (a) Simulated and (b) as synthesized PXRD patterns of complex **2**.

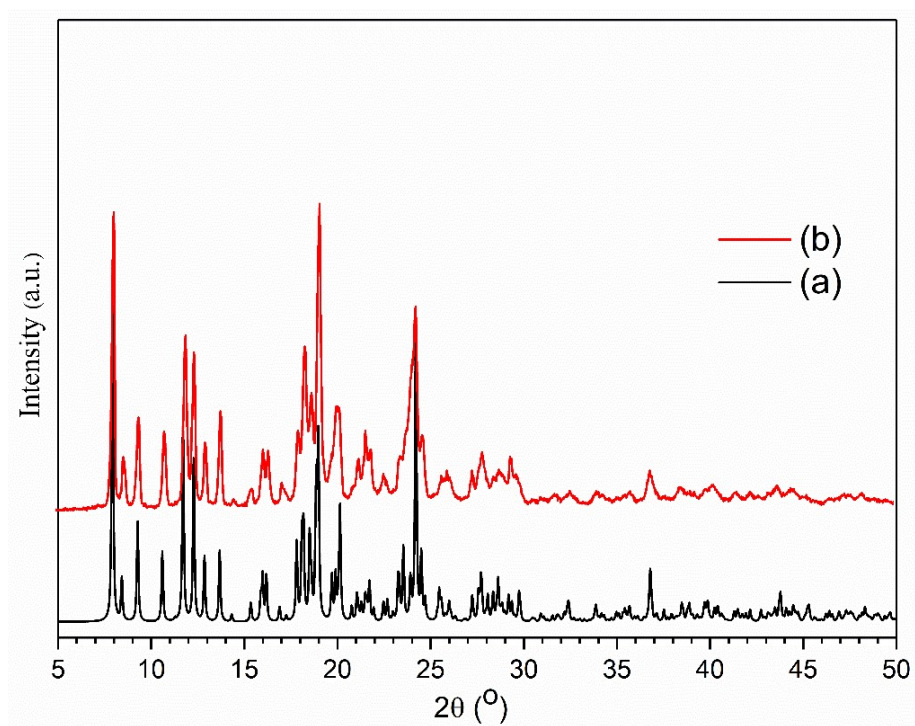

**Fig. S4** (a) Simulated and (b) as synthesized PXRD patterns of complex **3**.

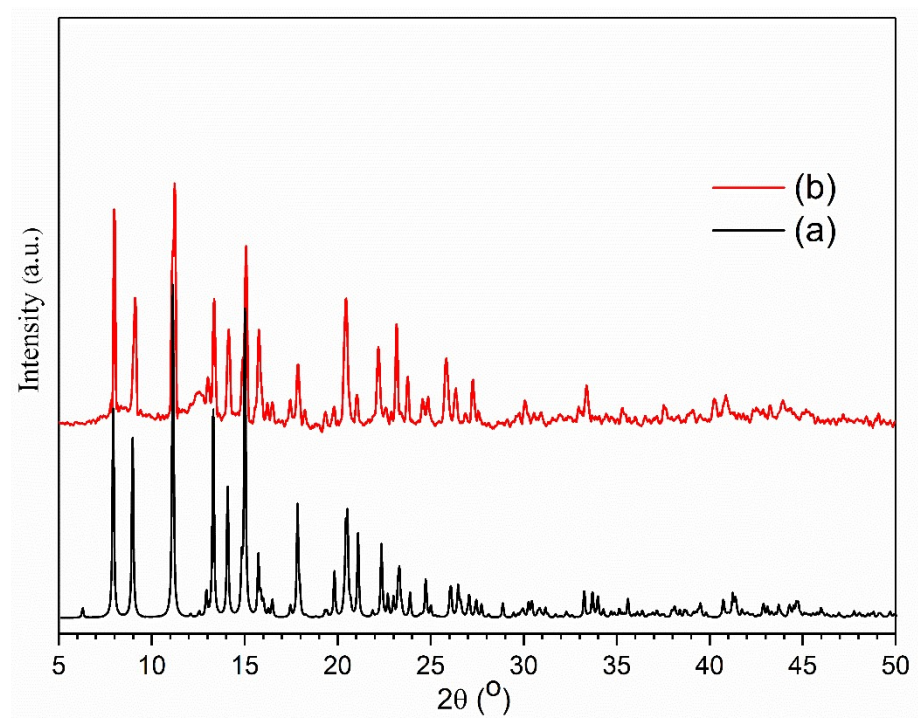

**Fig. S5** (a) Simulated and (b) as synthesized PXRD patterns of complex 4.

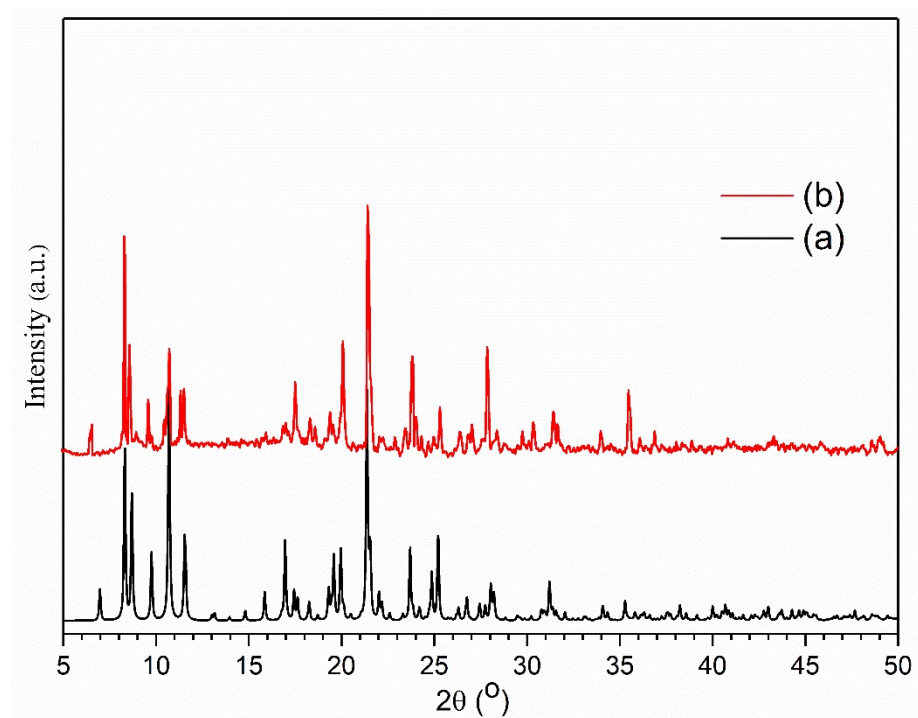

**Fig. S6** (a) Simulated and (b) as synthesized PXRD patterns of complex **5**.

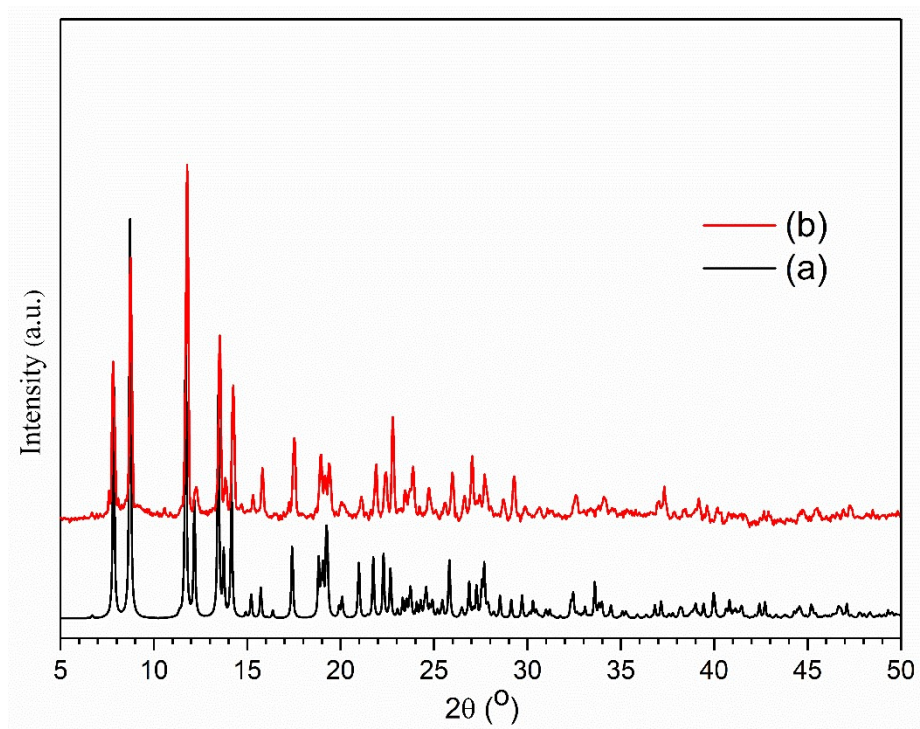



**Fig. S7** (a) Simulated and (b) as synthesized PXRD patterns of complex **6**.

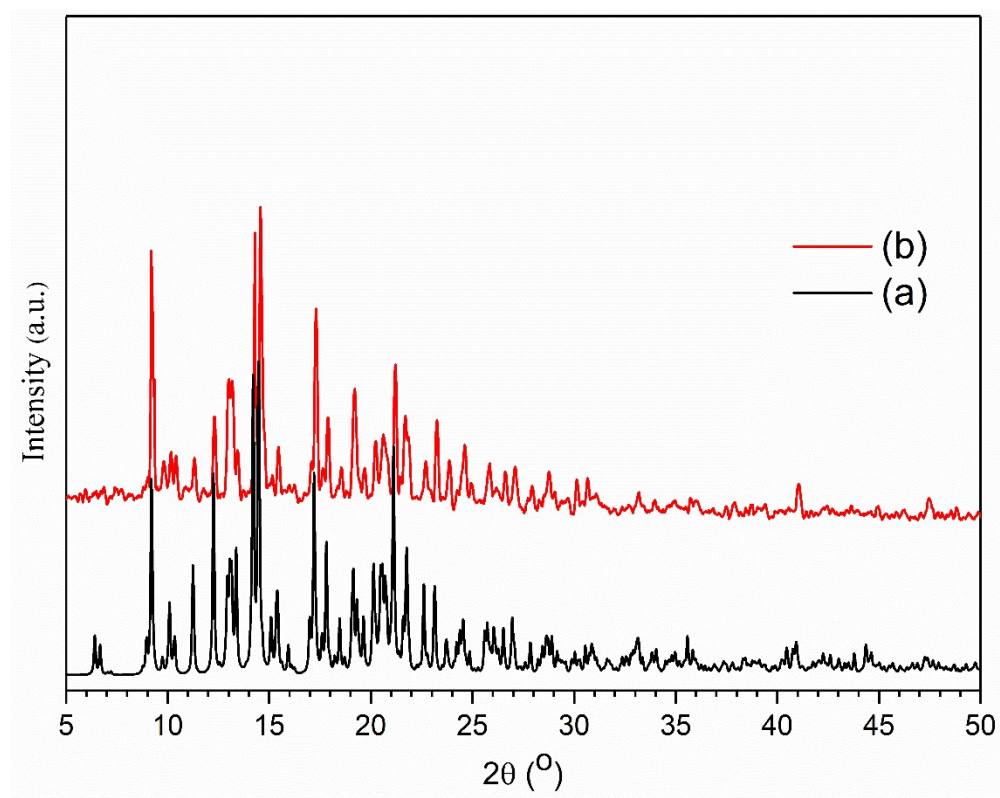

**Fig. S8** TGA curves for complexes (a) **1** (b) **2** (c) **3** (d) **4** (e) **5** and (f) **6**.

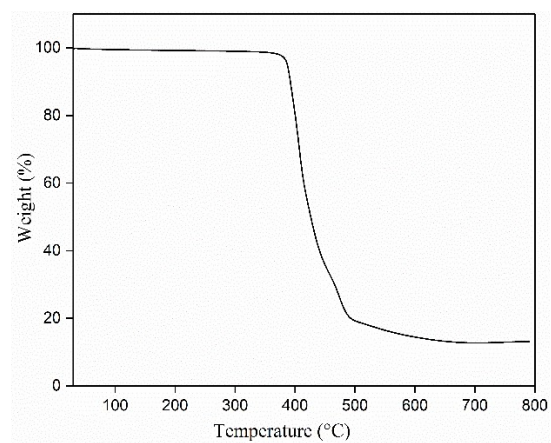

(a)

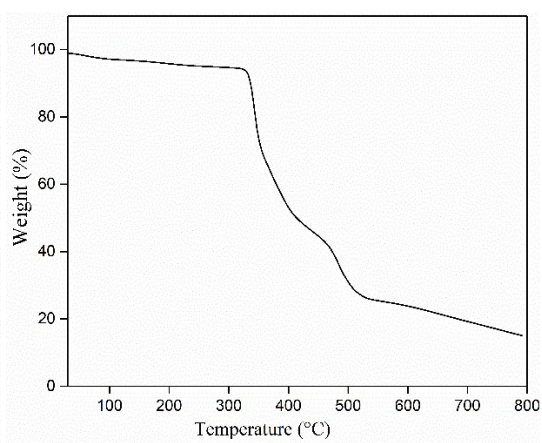

(b)

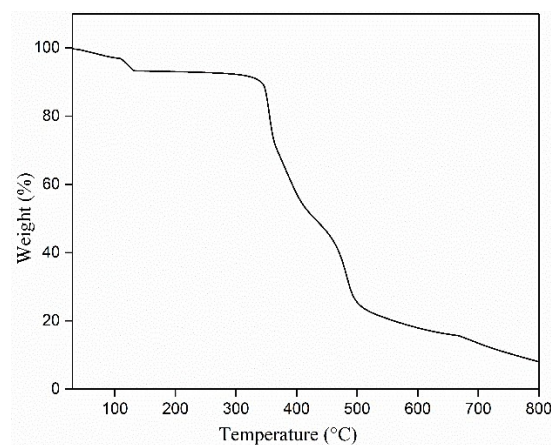

(c)

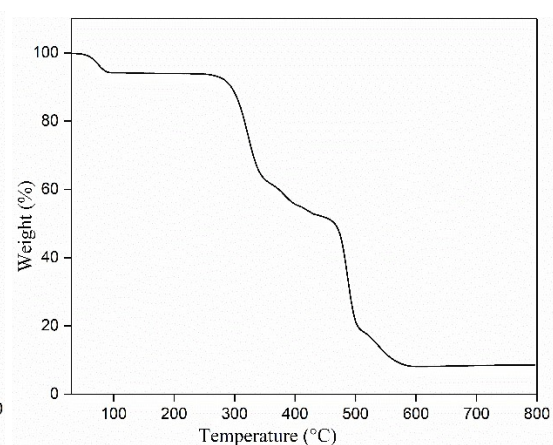

(d)

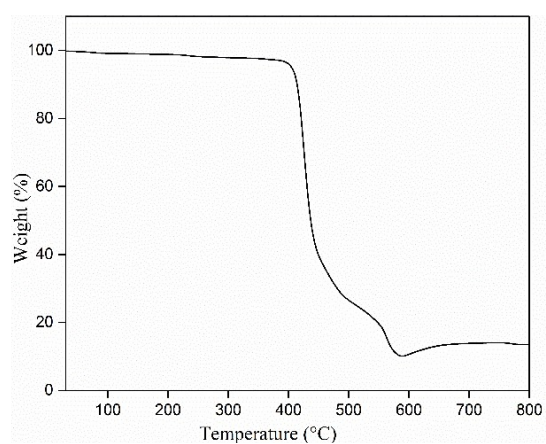

(e)

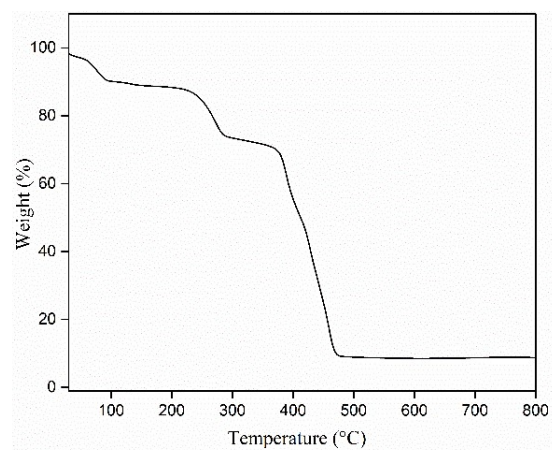

(f)

**Fig. S9** IR spectra for the structural transformations from **6** to **5**. (a) CP **6**, (b) CP **6** in hydrothermal reaction. The IR spectrum was measured using the purple crystals collected, and (c) CP**5**.

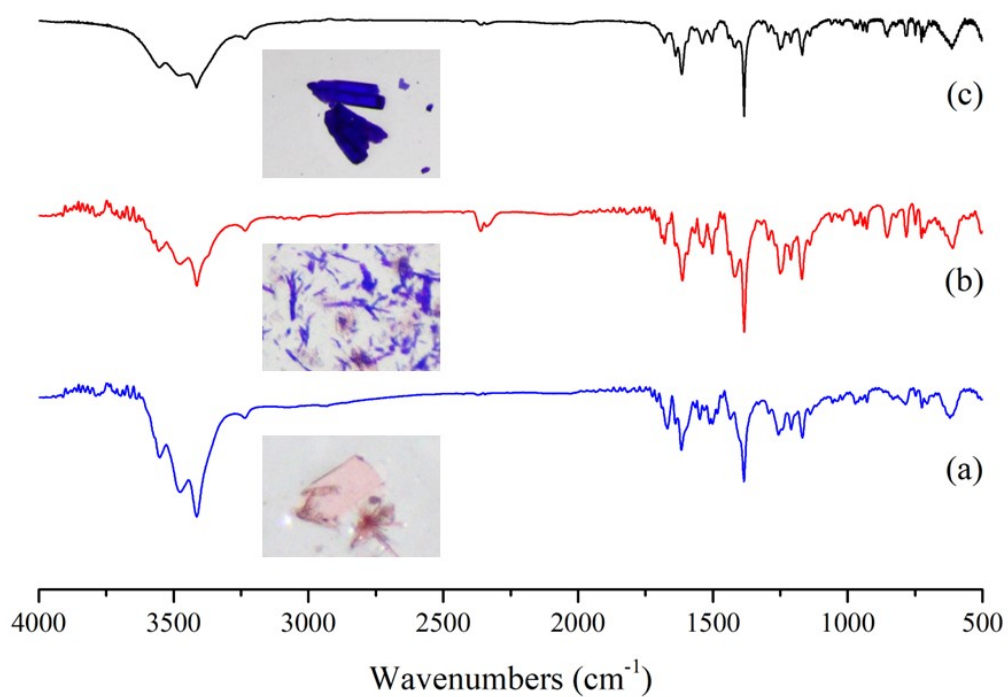

**Fig. S10** PXRD patterns for transformation from **5** to **6**.

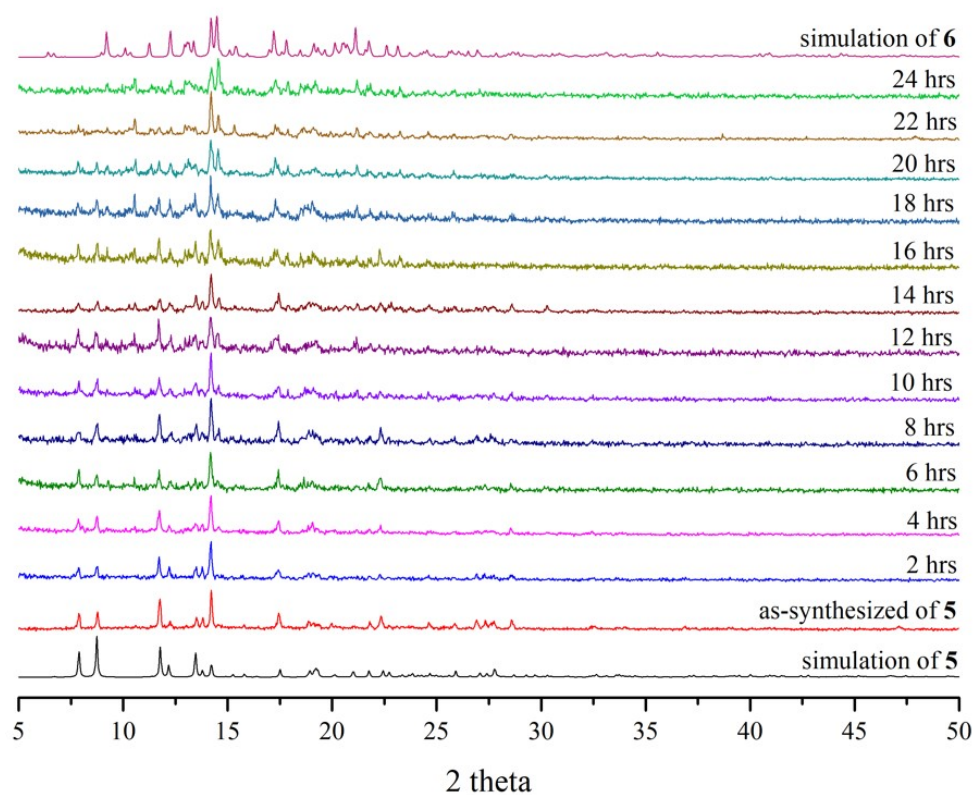

**Fig. S11** IR spectra for the structural transformations from **5** to **6**. (a) CP **5**, (b) CP **5** in water at room temperature and (c) CP **6**.

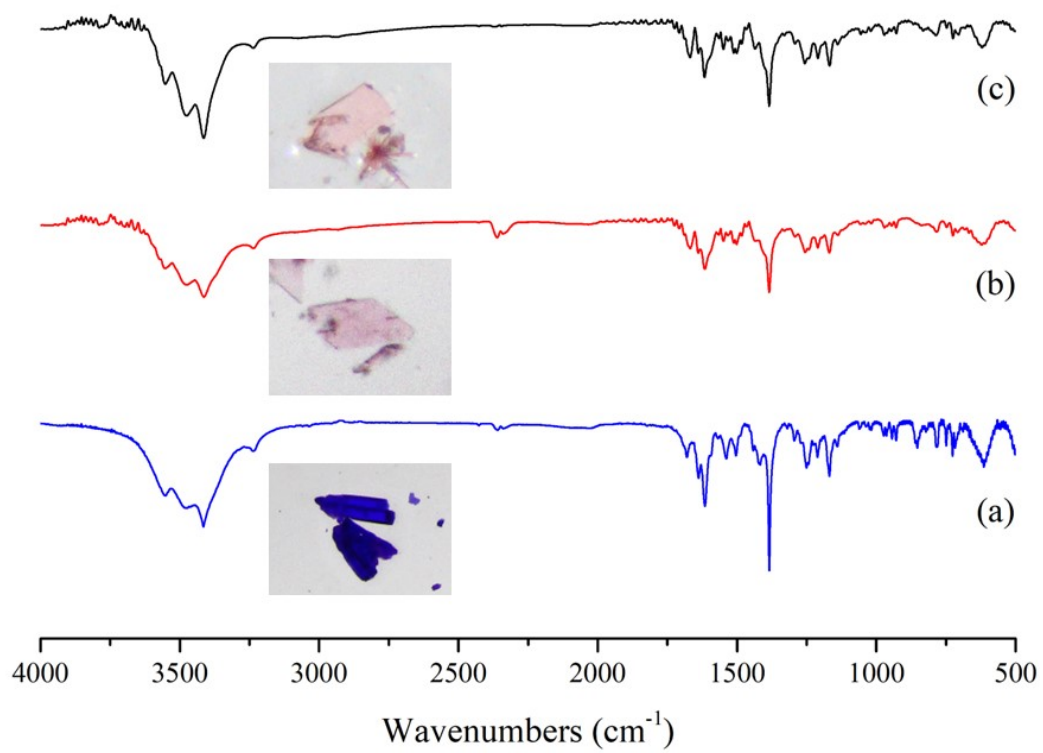

**Fig. S12** PXRD patterns of the dehydrated and rehydrated (a) **1** and (b) **2**, and **1** and **2** immersed in solutions with various pH values.

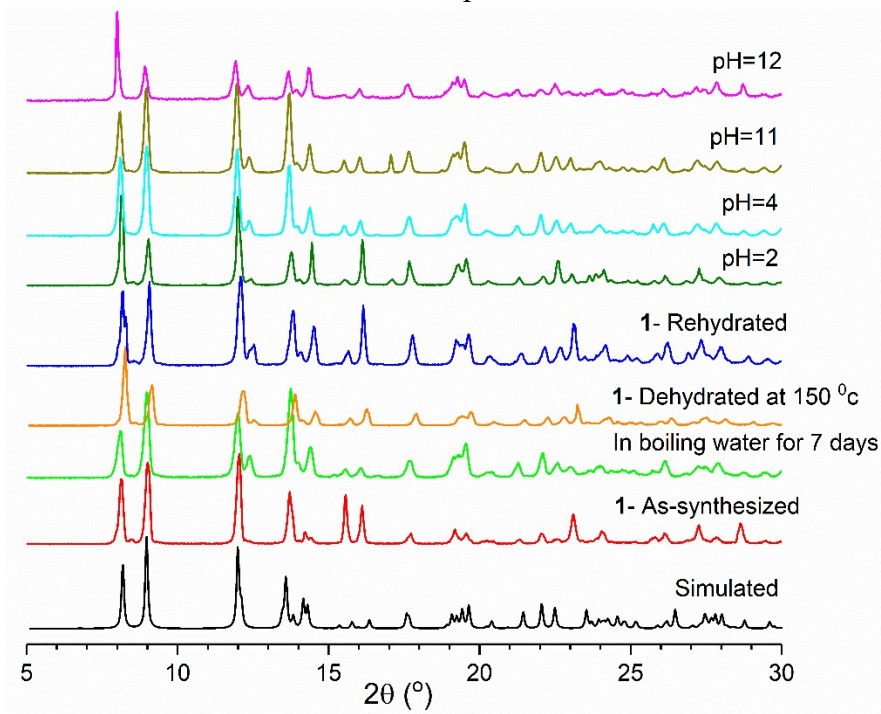

(a)

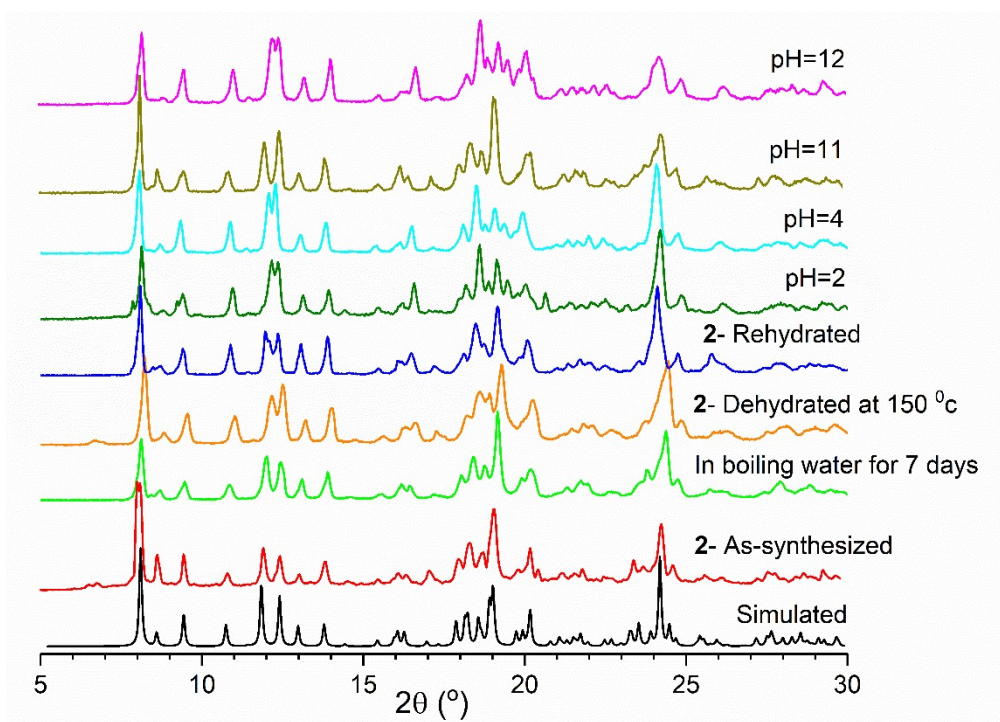

(b)

**Fig. S13** PXRD patterns of (a) **1** and (b) **2** immersed in various solvents for 48 h.

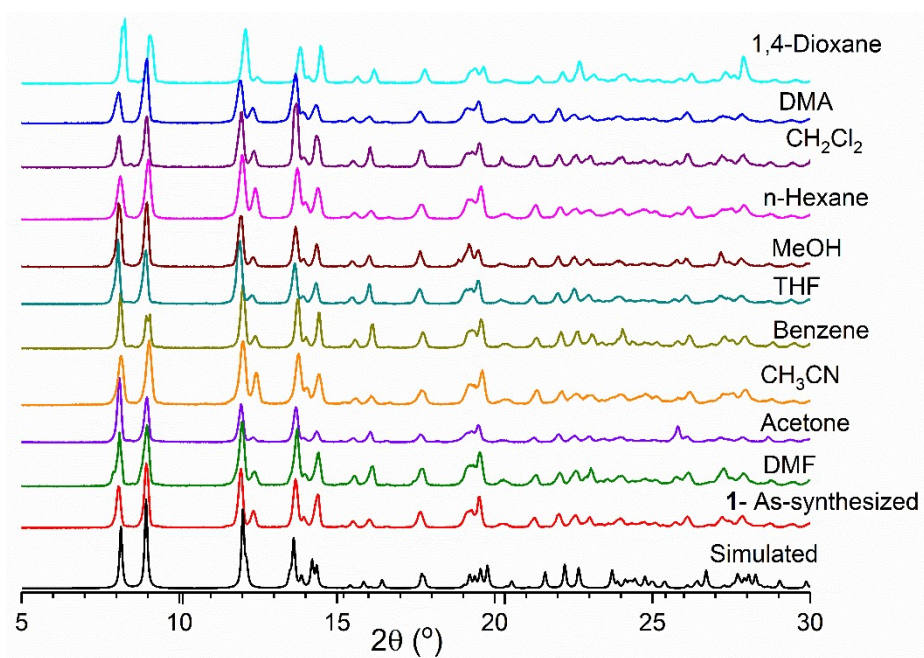

(a)

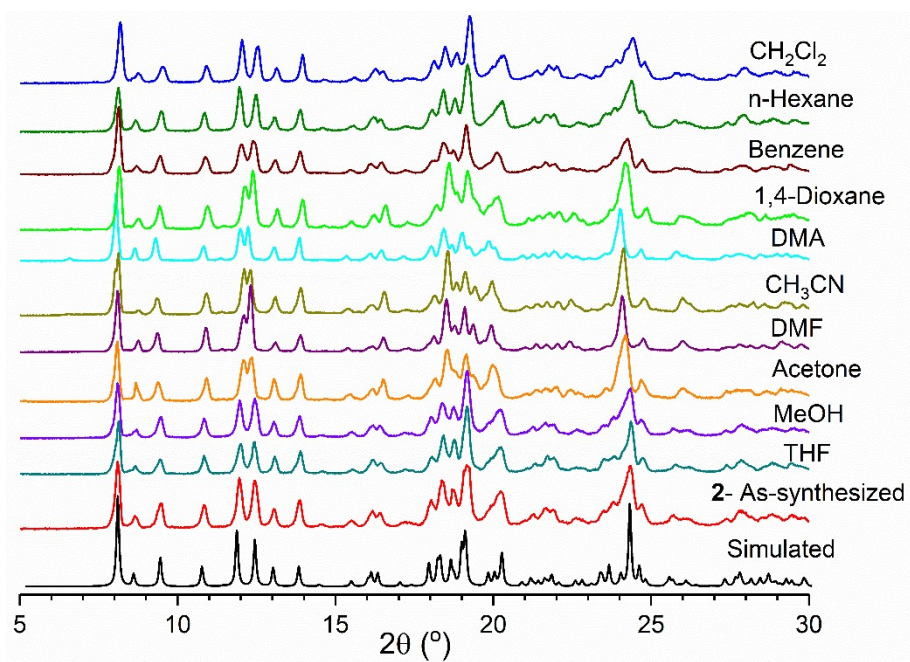

(b)

**Fig. S14** (a) CO<sub>2</sub> sorption isotherm of complex **1** at 273 K and (b) pore size distributions.

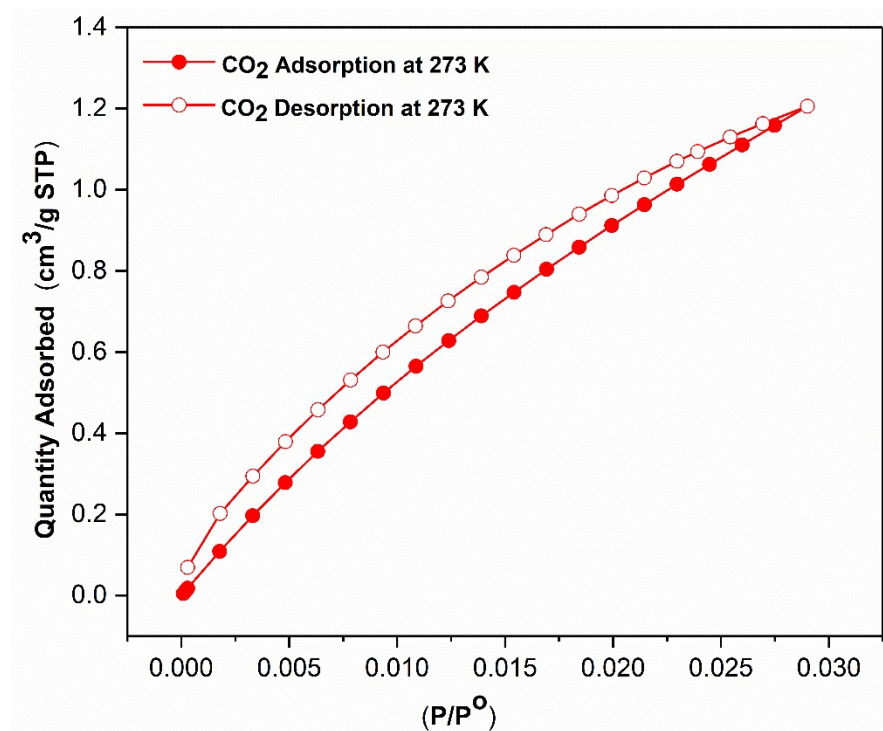

(a)

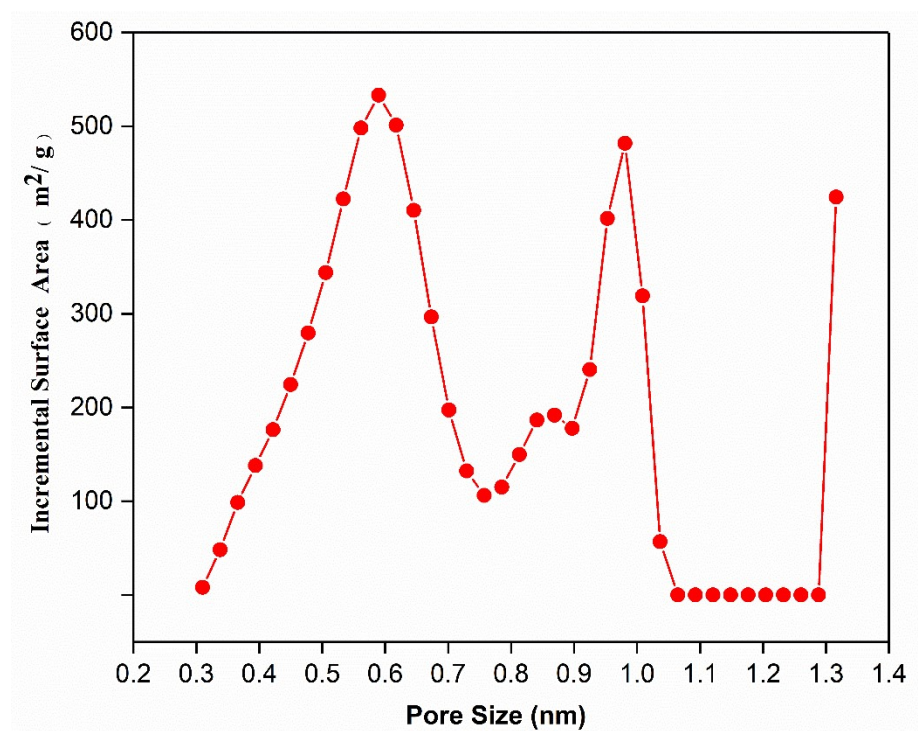

(b)



**Fig. S15** (a) CO<sub>2</sub> sorption isotherm of complex **2** at 273 K and (b) pore size distributions.

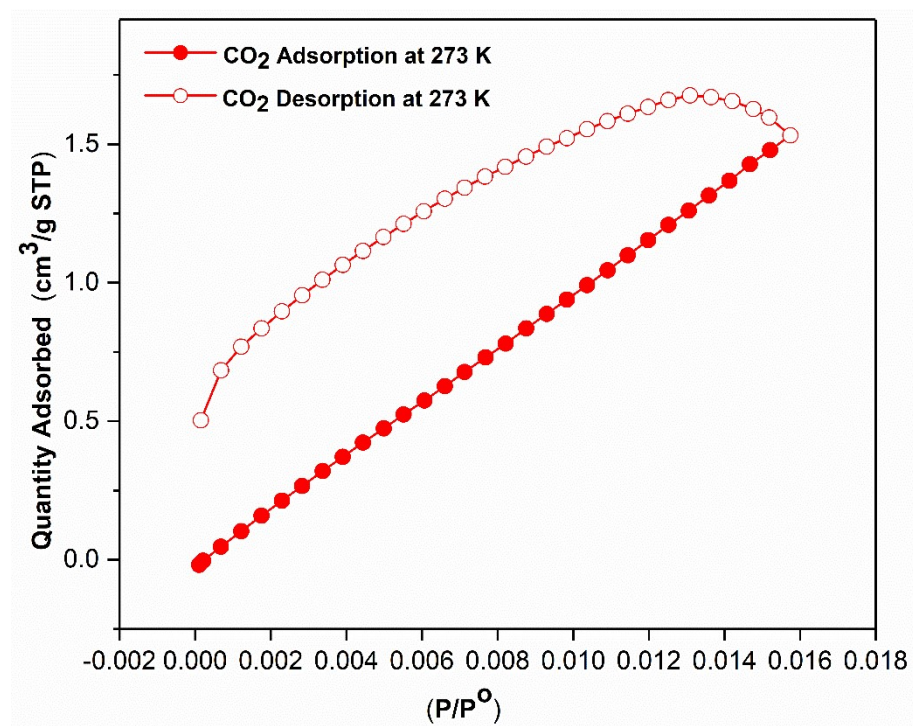

(a)

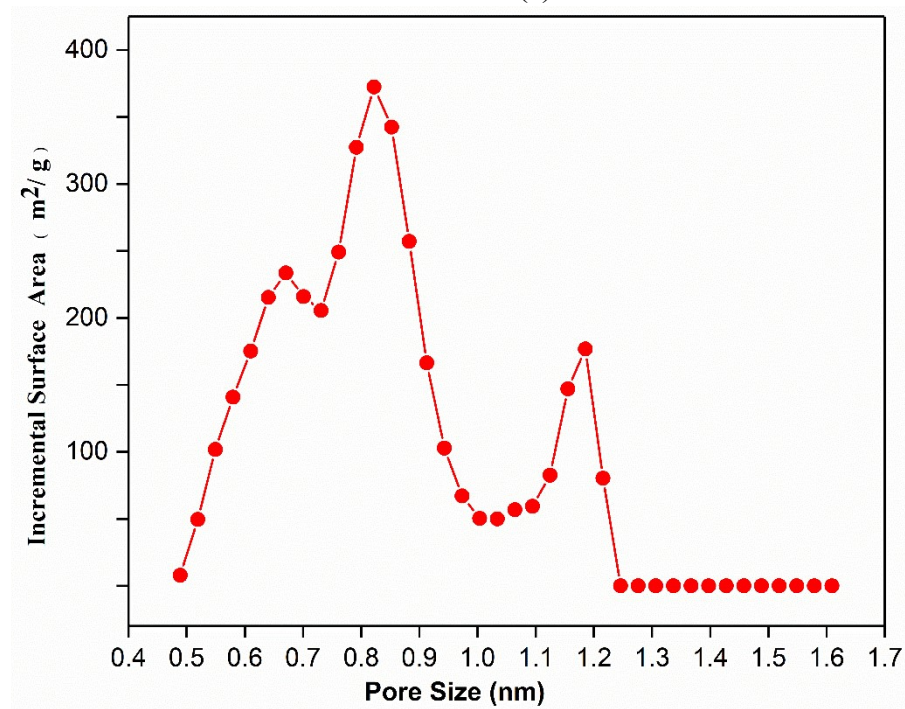

(b)

**Fig. S16** CO<sub>2</sub> sorption isotherms of complexes (a) **1** and (b) **2** at 298 K and PXRD patterns of (c) **1** and (d) **2** measured after experiments.

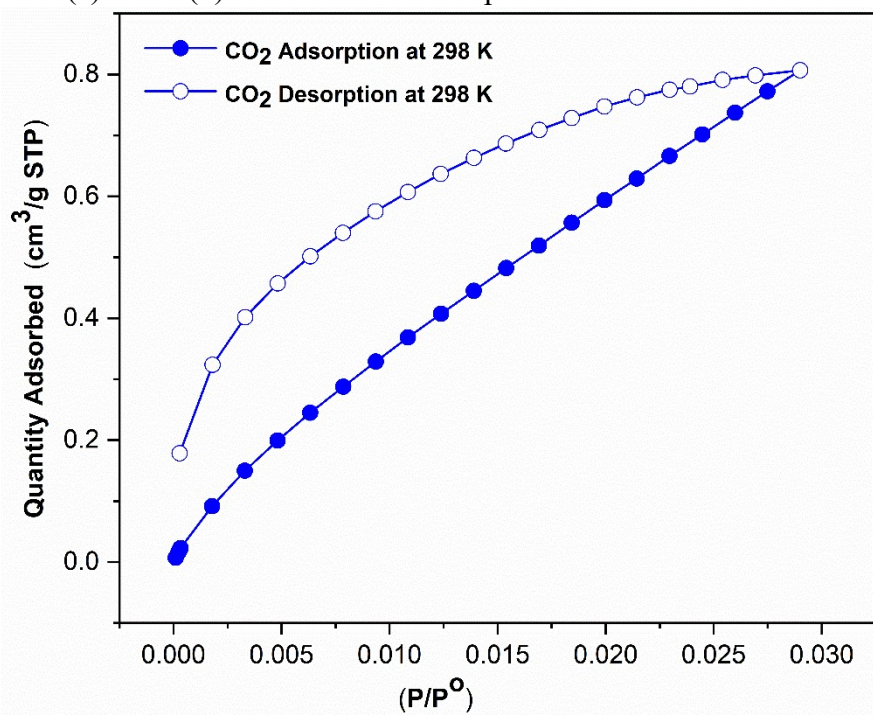

(a)

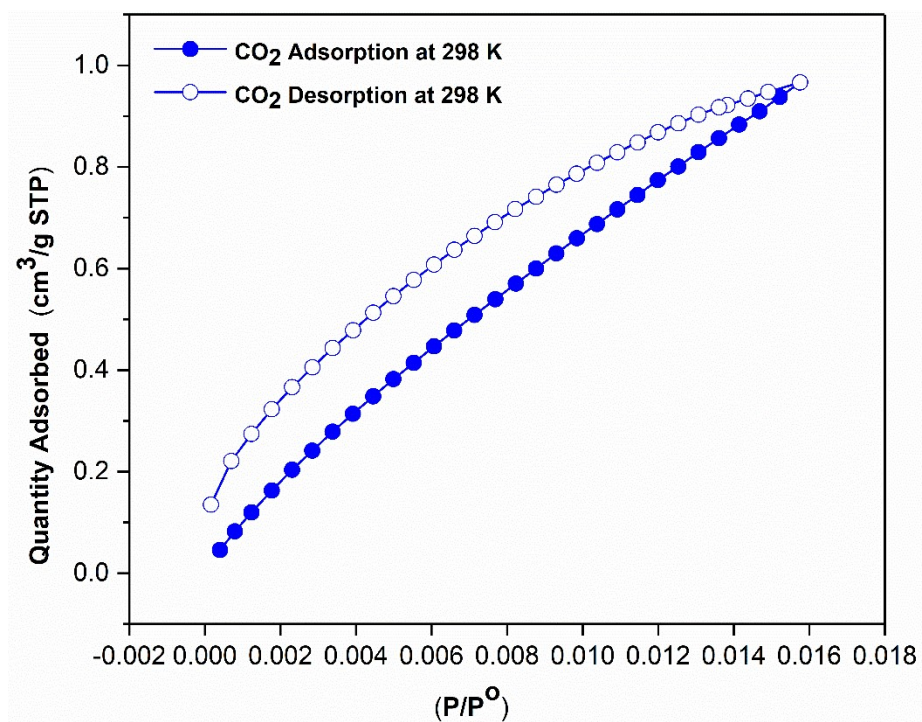

(b)

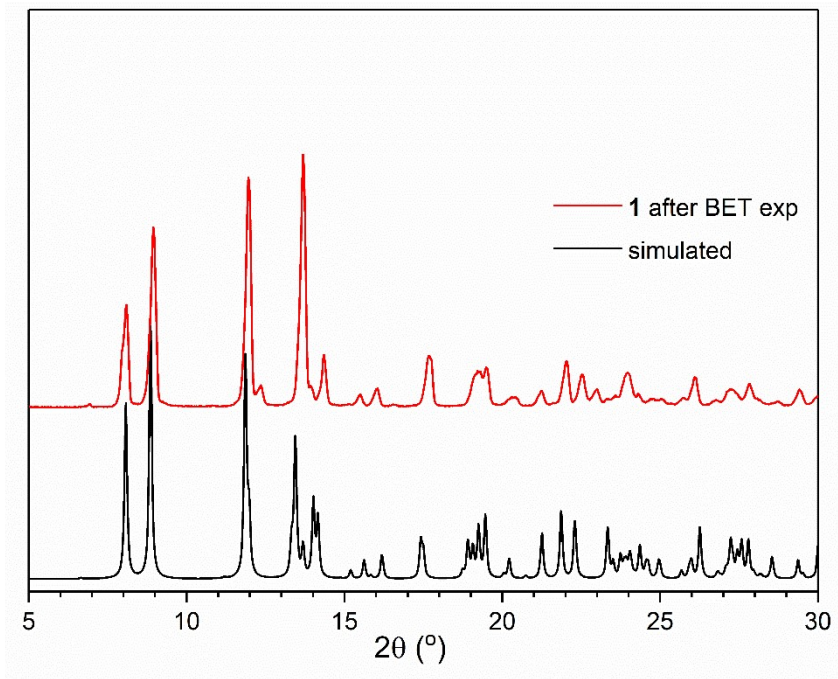

(c)

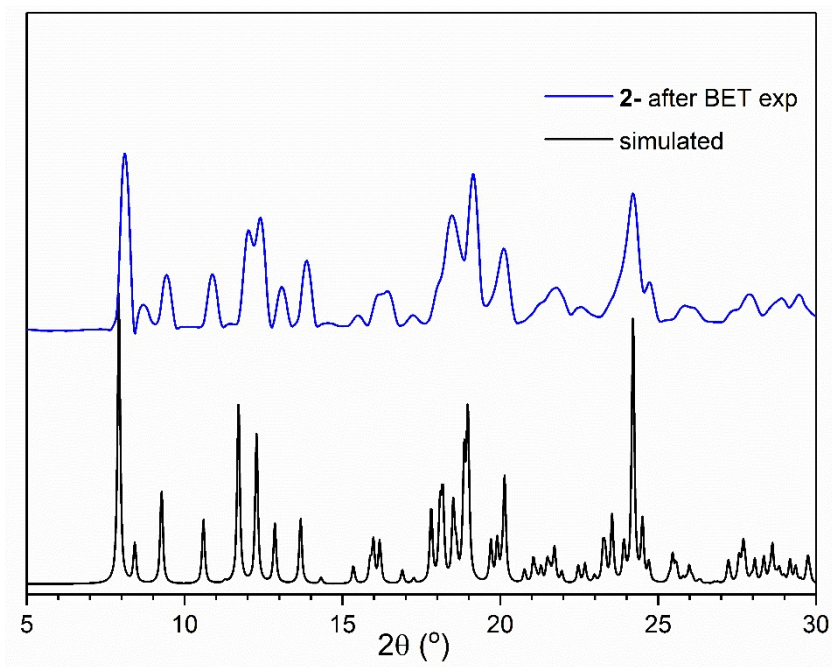

(d)

**Fig. S17** Excitation and emission spectra for (a)  $L^1$  and  $L^2$  and (b)  $H_2FIPBB$ ,  $H_2OBA$  and **1** and **2**.

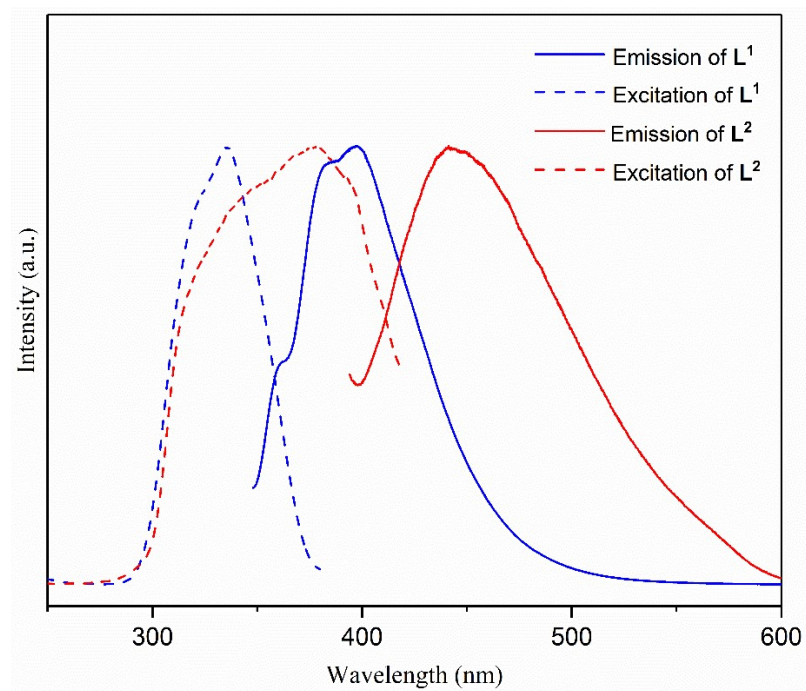

(a)

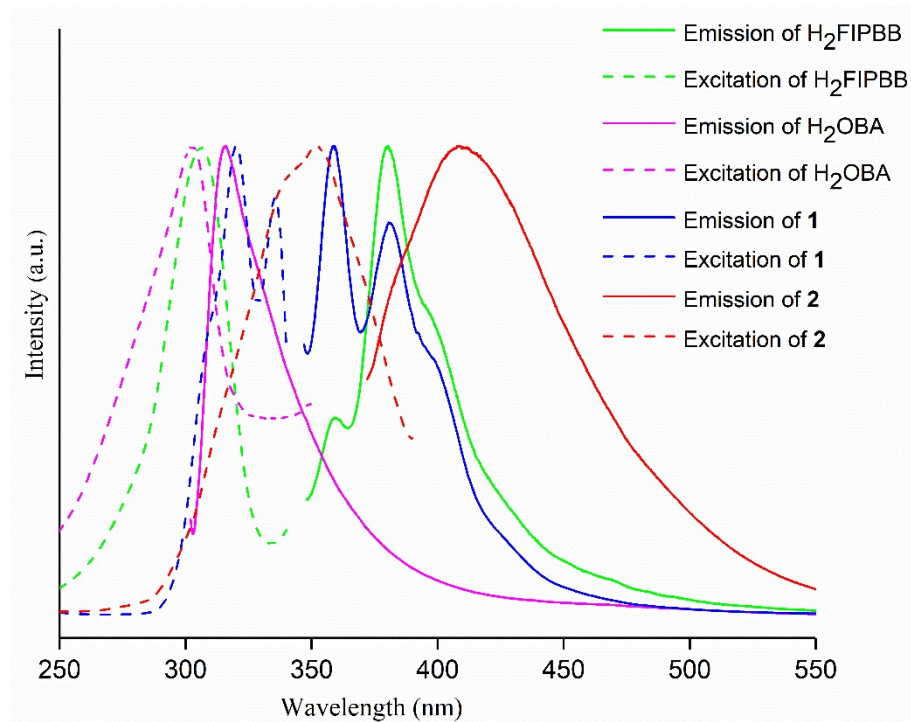

(b)

**Fig. S18** Emission spectra of solvent-free (a) **1** and (b) **2** dispersed in DCM with various pesticides.

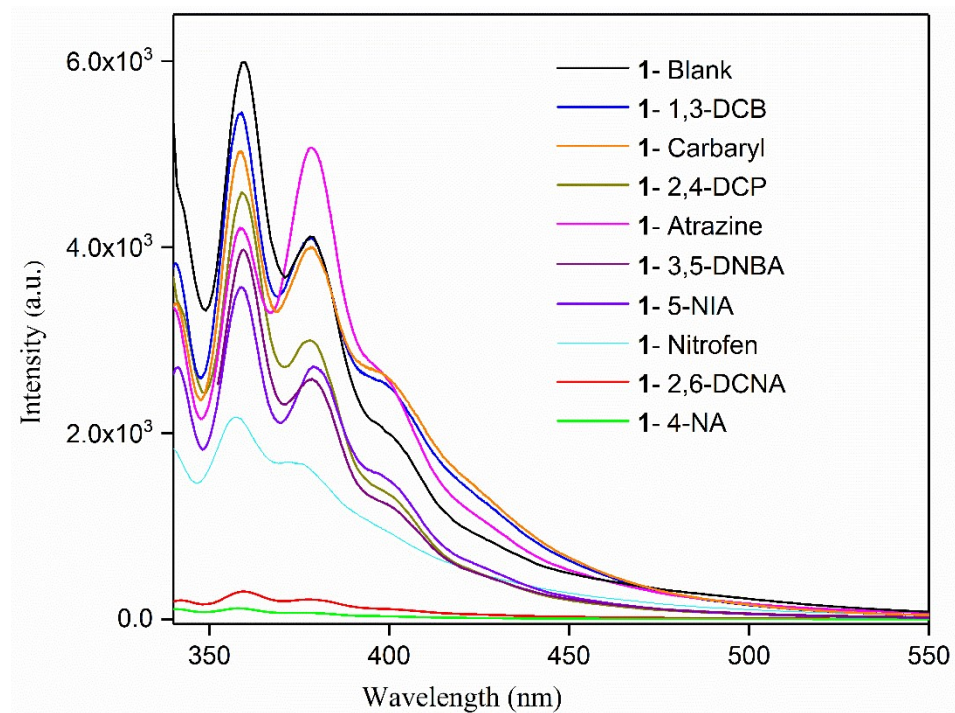

(a)

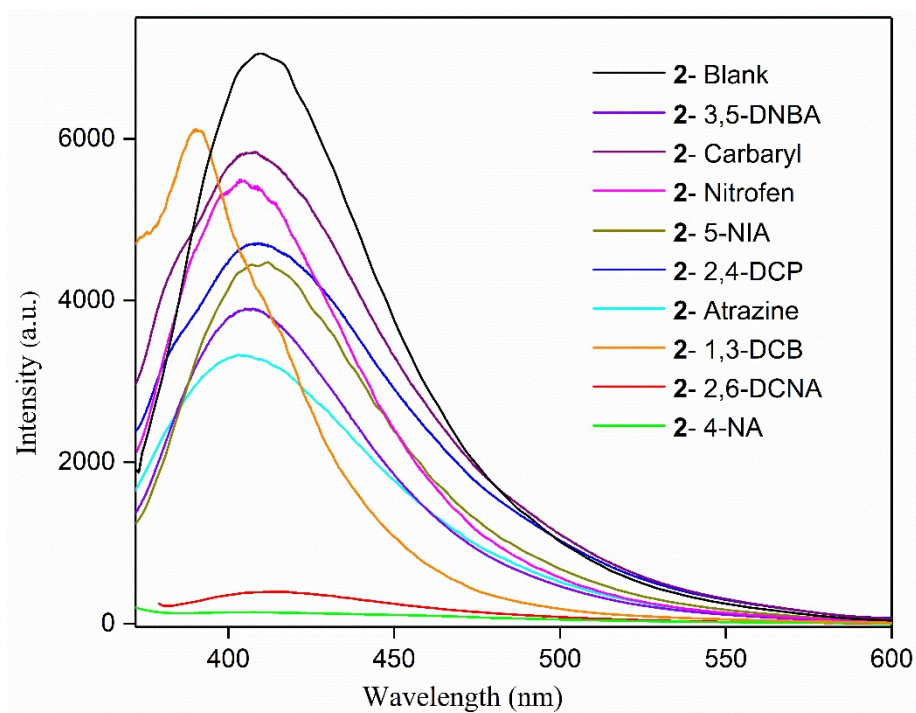

(b)

**Fig. S19** PXRD patterns before and after treatments with 2,6-DCNA and 4-NA for (a) **1** and (b) **2**.

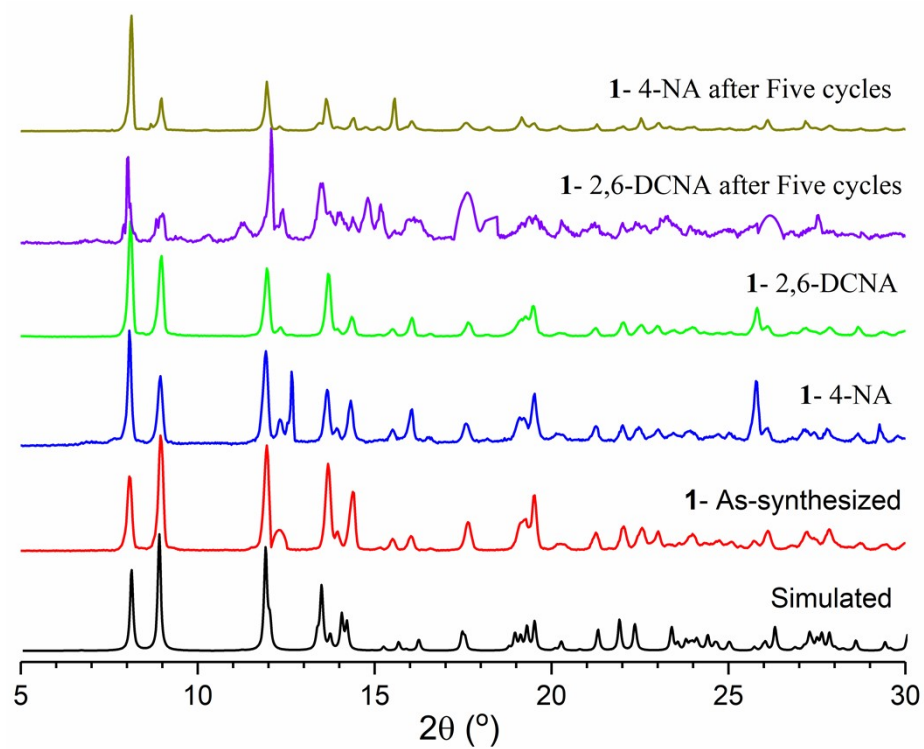

(a)

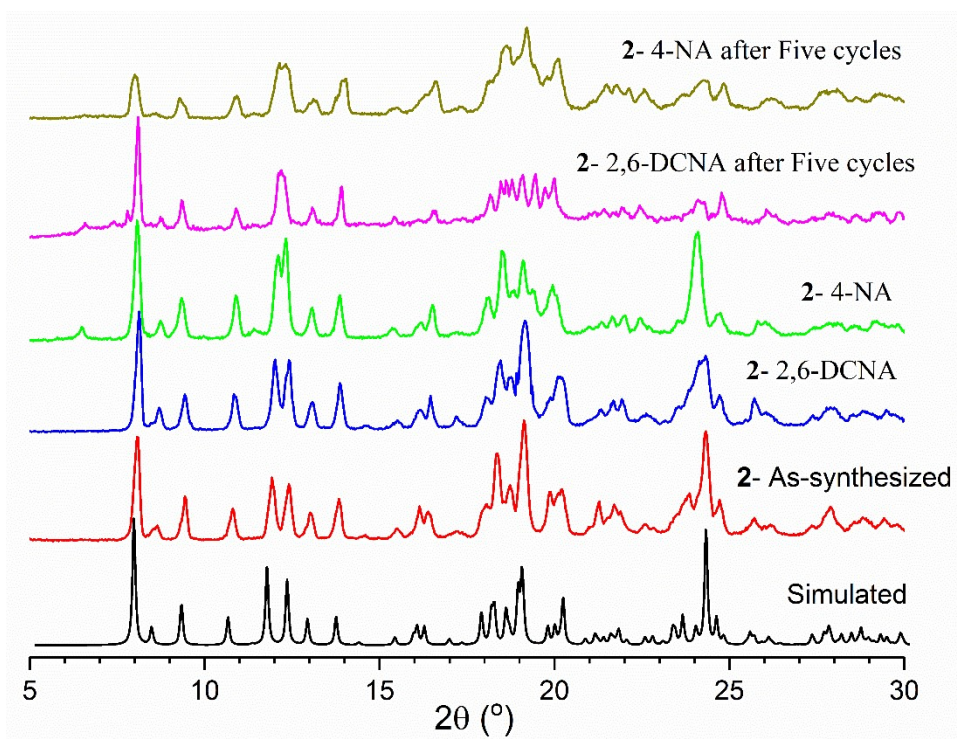

(b)

**Fig. S20** Emission spectra of the activated samples **1** dispersed in DCM of (a) 2,6-DCNA and (b) 4-NA at various concentration.

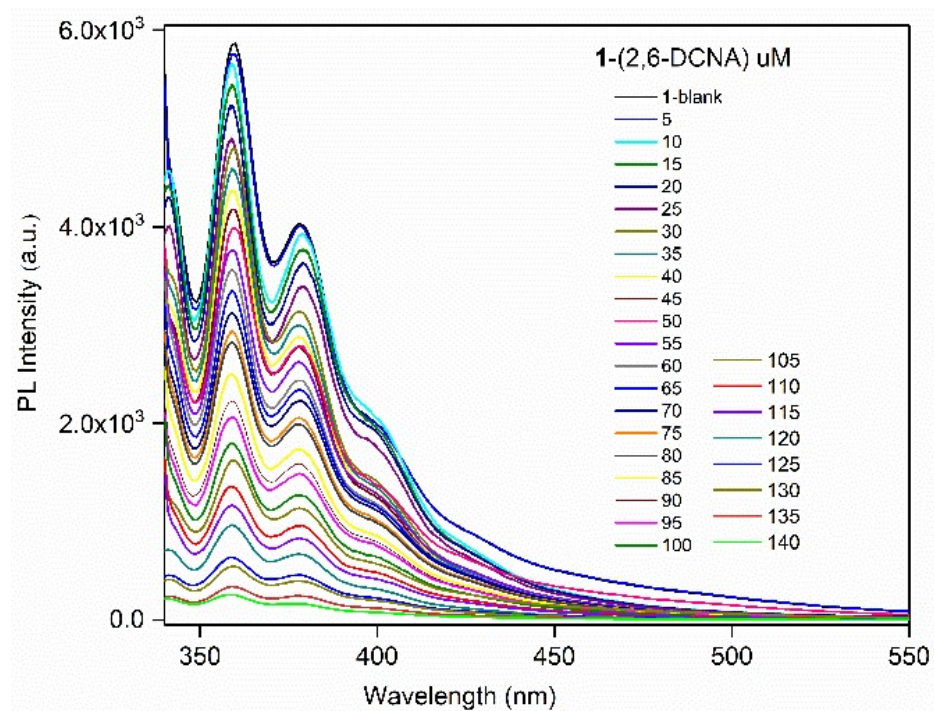

(a)

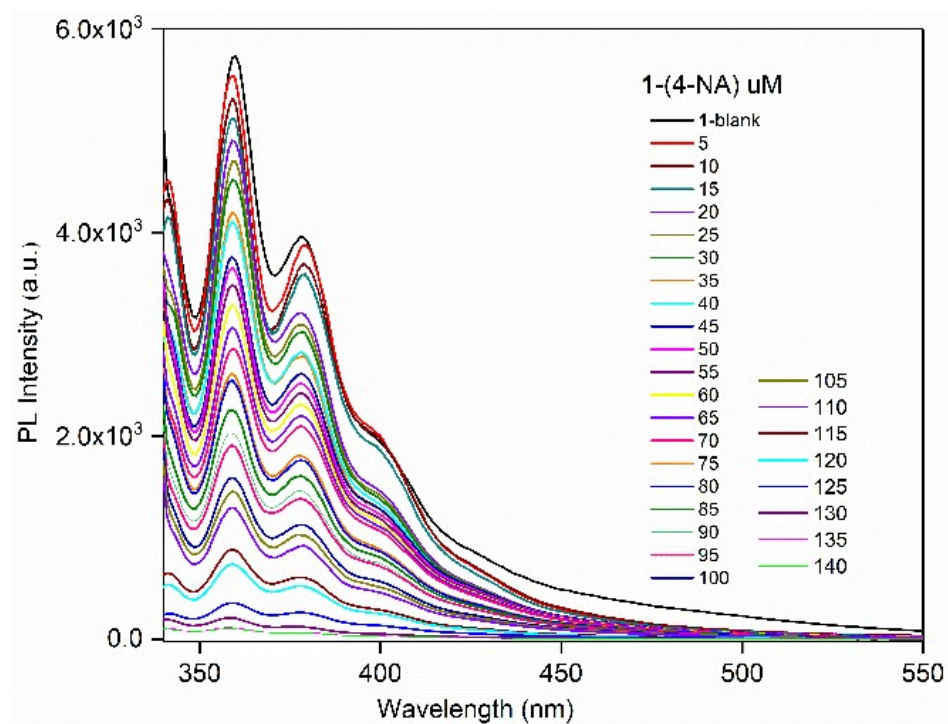

(b)

**Fig. S21** Emission spectra of the activated samples **2** dispersed in DCM of (a) 2,6-DCNA and (b) 4-NA at various concentration.

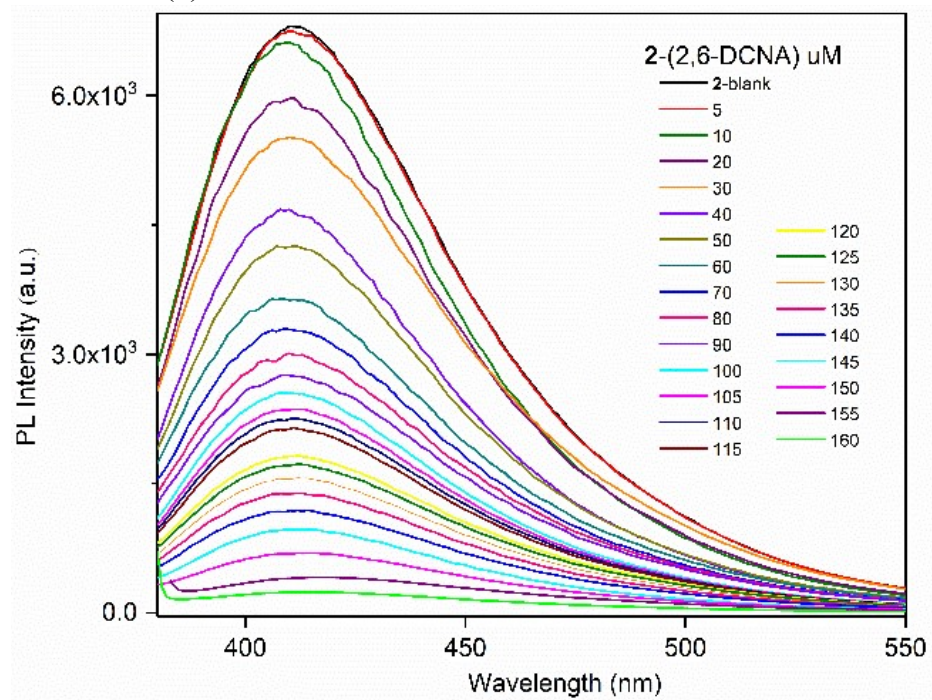

(a)

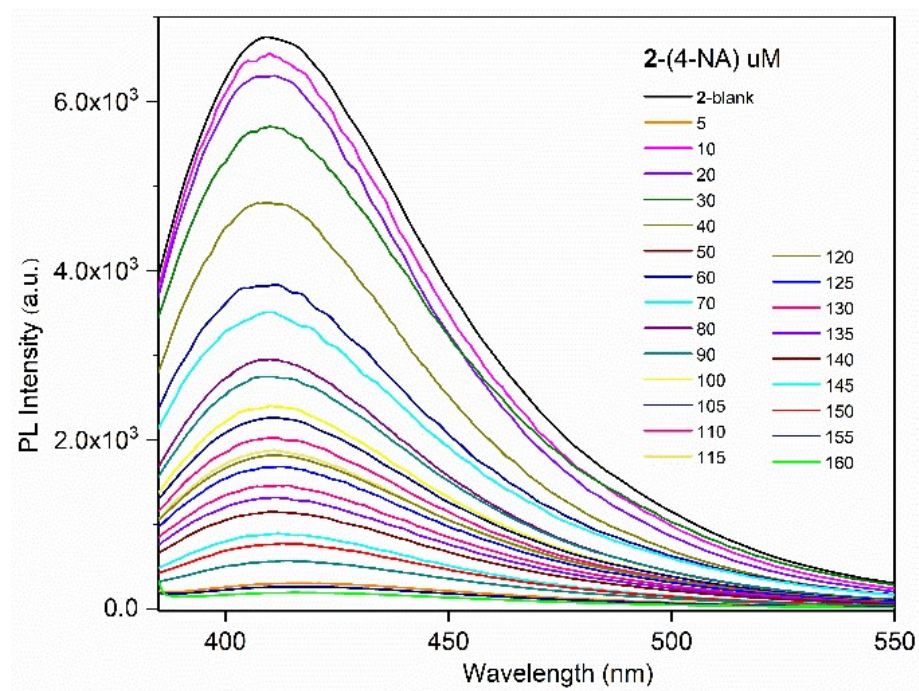

(b)



Fig. S22 (a) Bar diagrams showing the relative emission intensities of **1** and **2** dispersed in various pesticides and the Stern–Volmer (SV) plot of **1** in (b) 2,6-DCNA and (c) 4-NA and **2** in (d) 2,6-DCNA and (e) 4-NA, showing  $I_0/I$  versus analyte concentration.

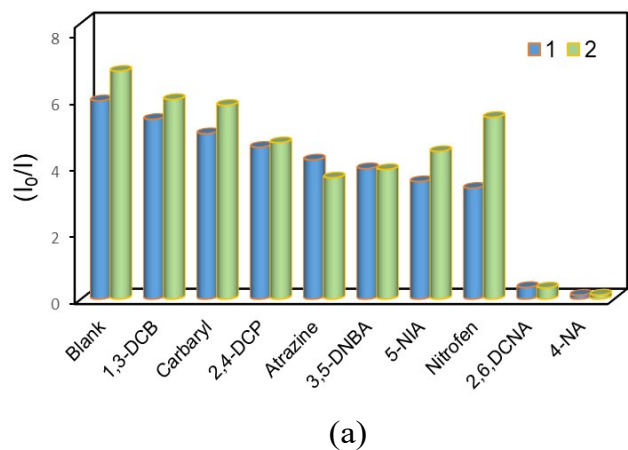

(a)

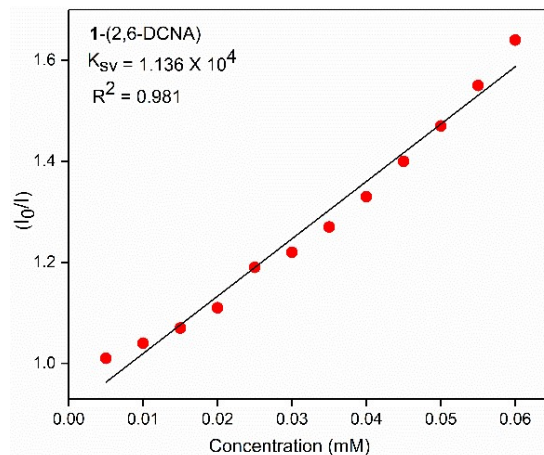

(b)

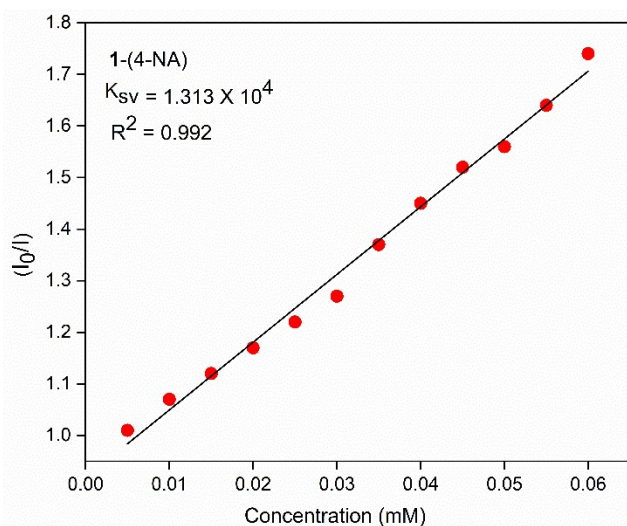

(c)

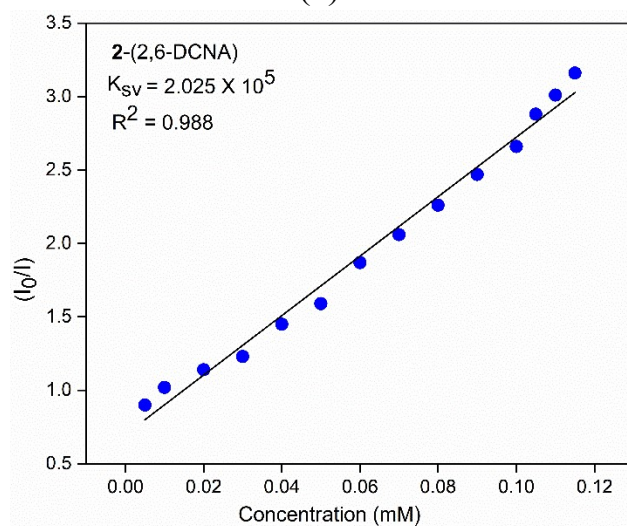

(d)

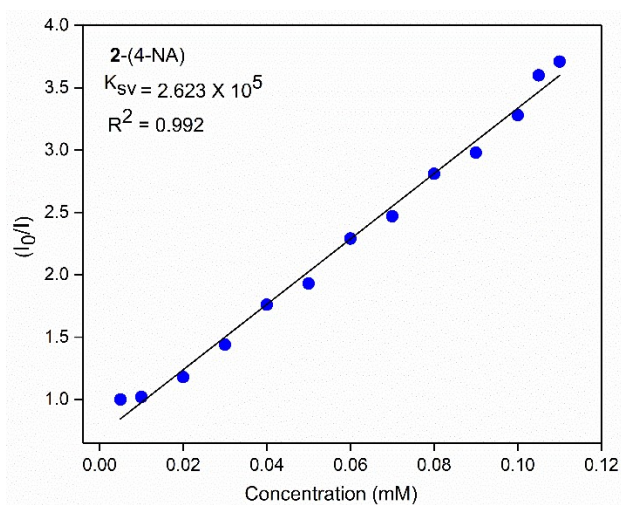

(e)

**Fig. S23** Bar diagrams showing the emission intensities of (a) **1** and (b) **2** treated with 2,6-DCNA and 4-NA for five repeated cycles.

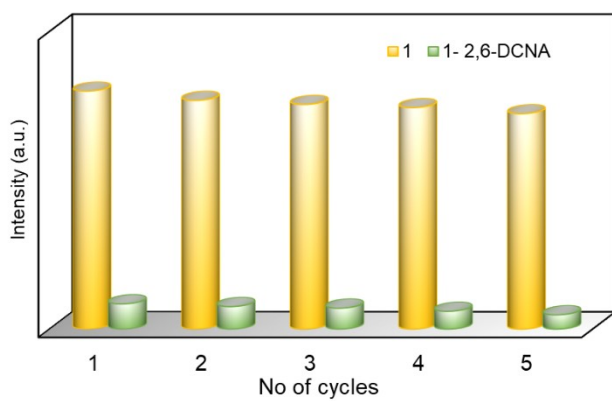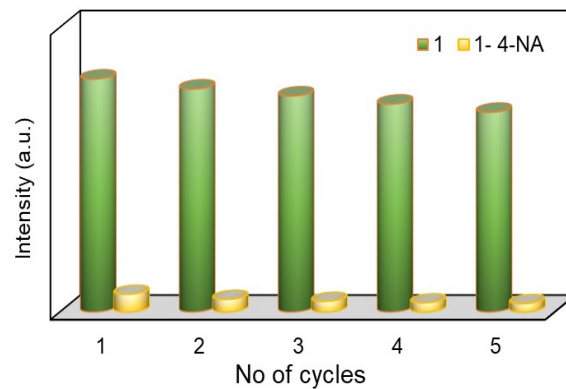

(a)

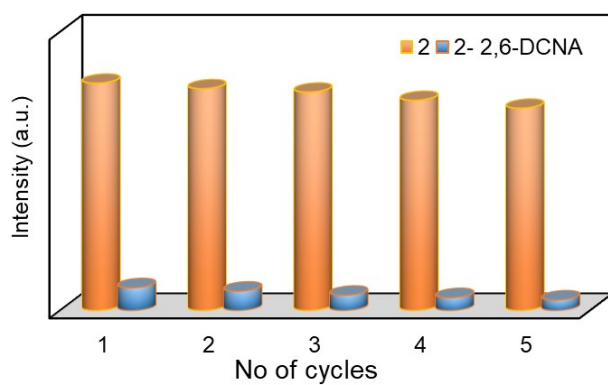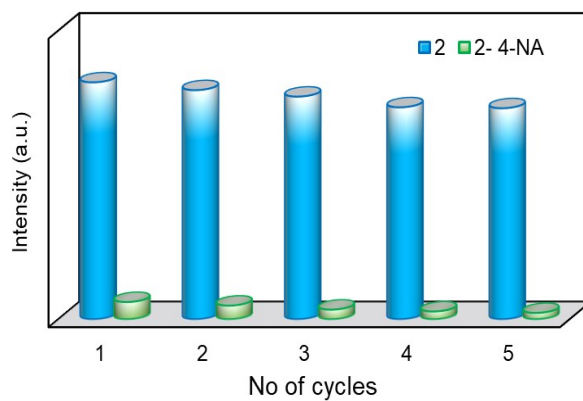

(b)

**Fig. S24** The IR spectra of complex (a) **1** and (b) **2** before and after treated with 4-NA and 2,6-DCNA.

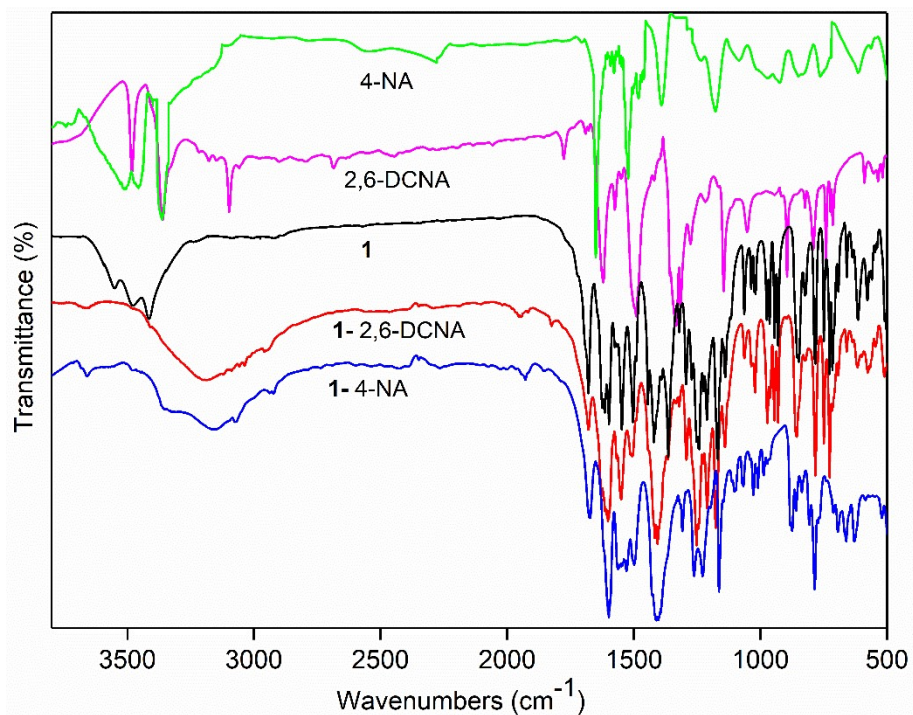

(a)

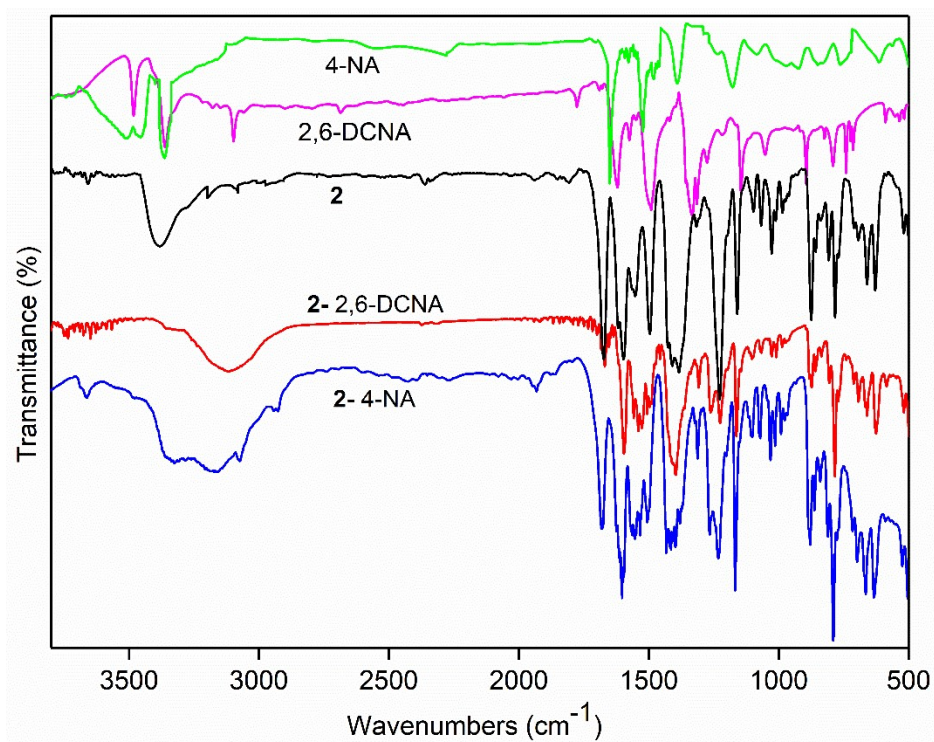

(b)

**Fig. S25** UV-vis absorption spectrum of 4-NA and 2,6-DCNA in DCM solution and the excitation and emission spectra of (a) **1** and (b) **2**.

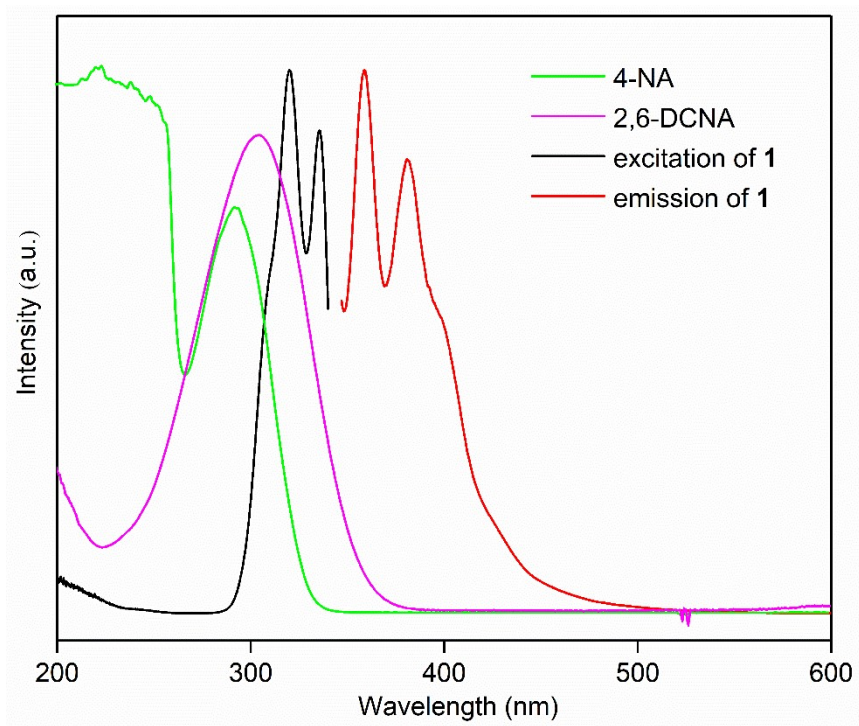

(a)

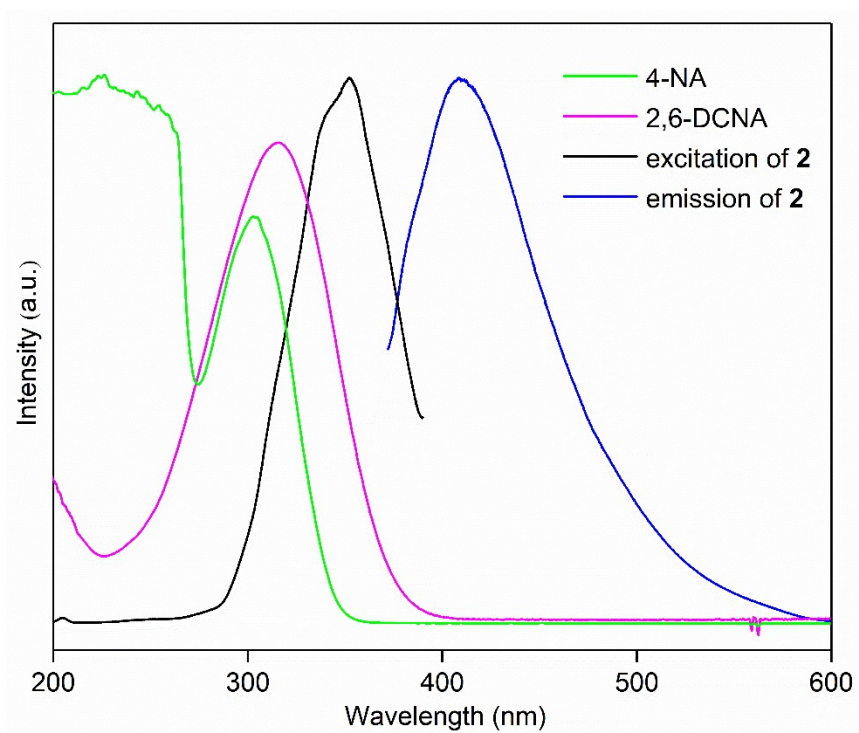

(b)

**Fig. S26** Water contact angle (WCA) images of samples (a) **1** (b) **2** (c) **3** (d) **4** (e) **5** and (f) **6**

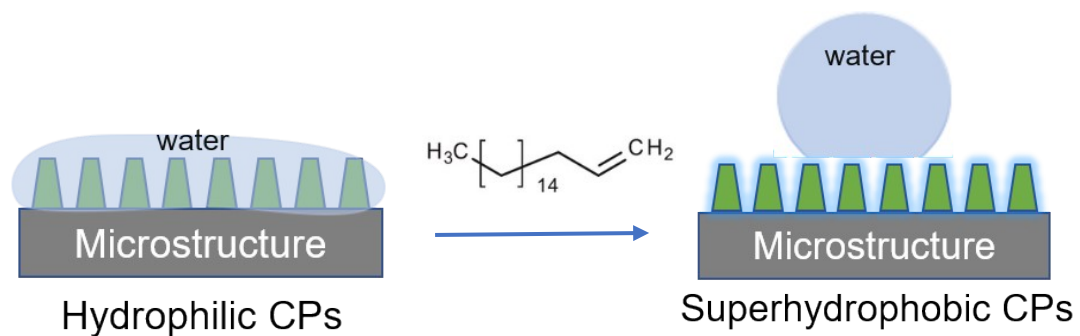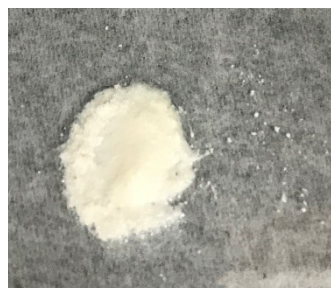

CP-1

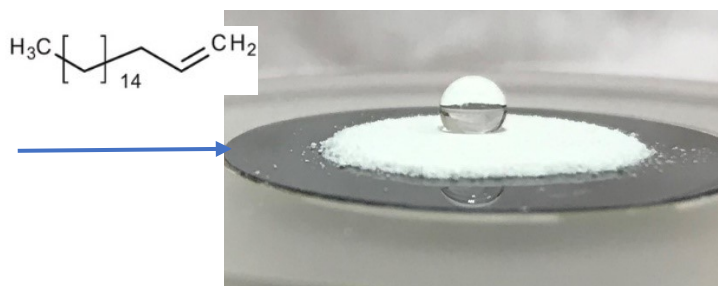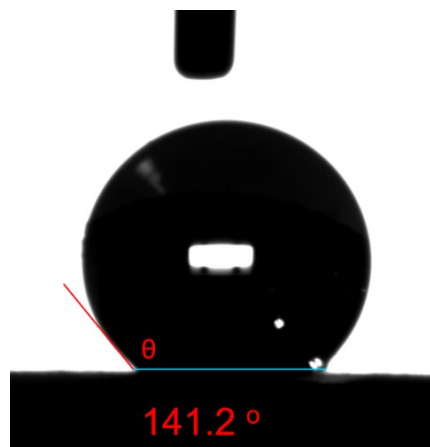

(a)

CP-1-C-18

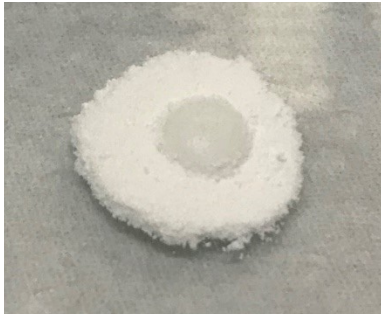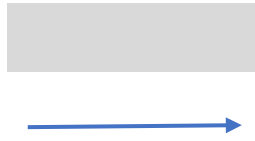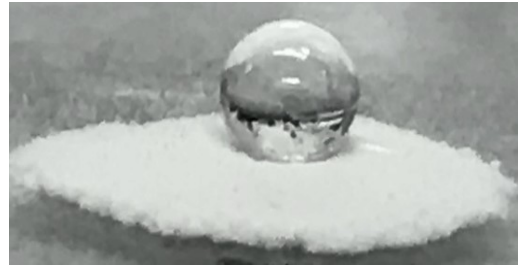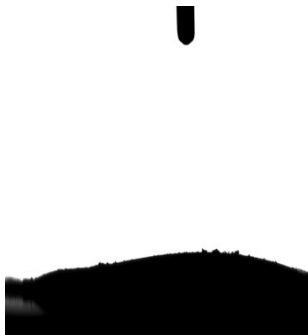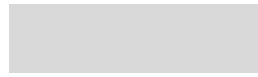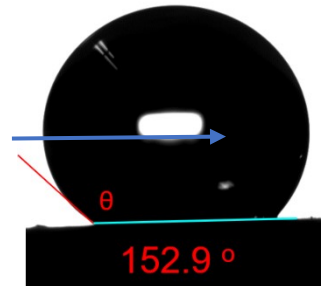

CP-2

CP-2-C-18

(b)

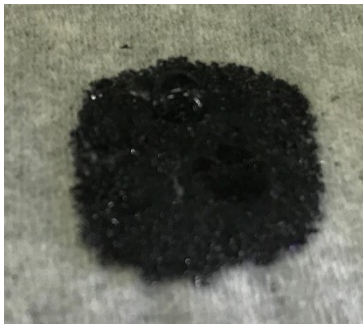

CP-3

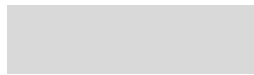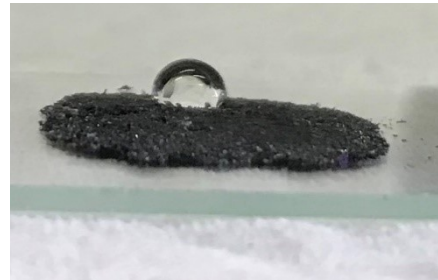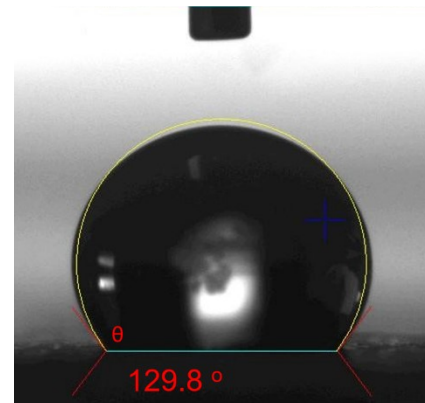

CP-3-C-18

(c)

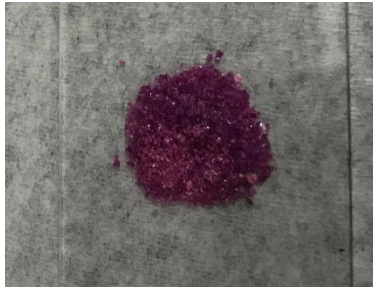

CP-4

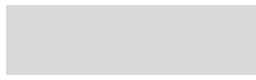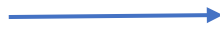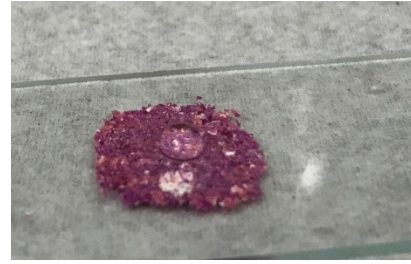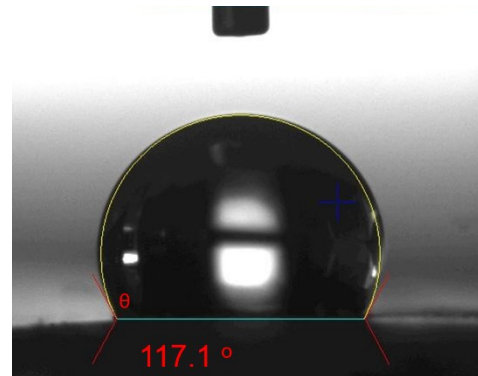

CP-4-C-18

(d)

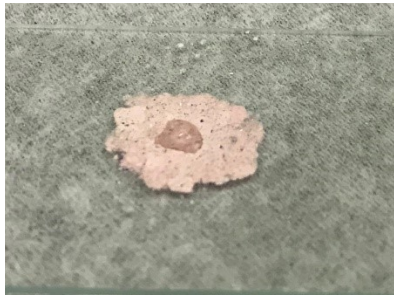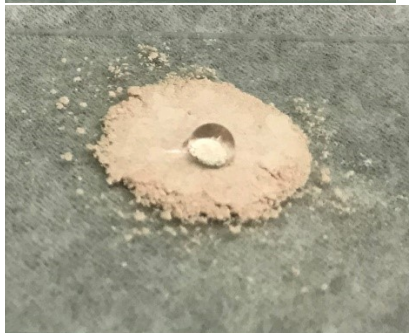

CP-5

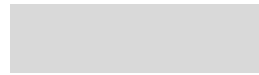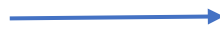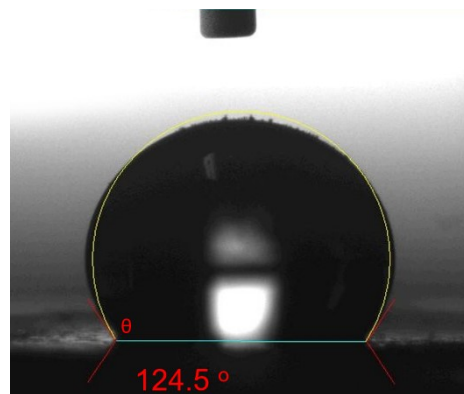

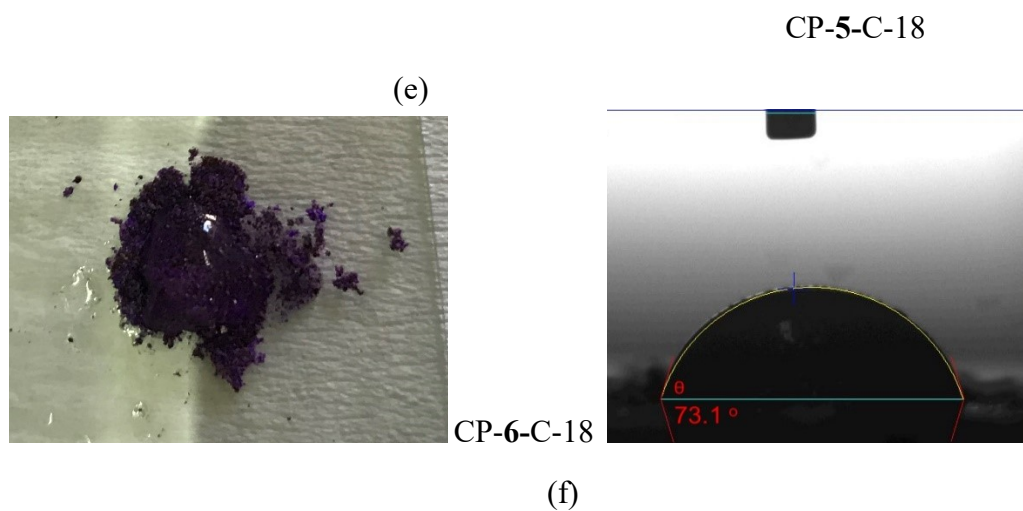

**Fig. S27** FT-IR analysis for **2** (black curve) and **2-C18** (red curve).

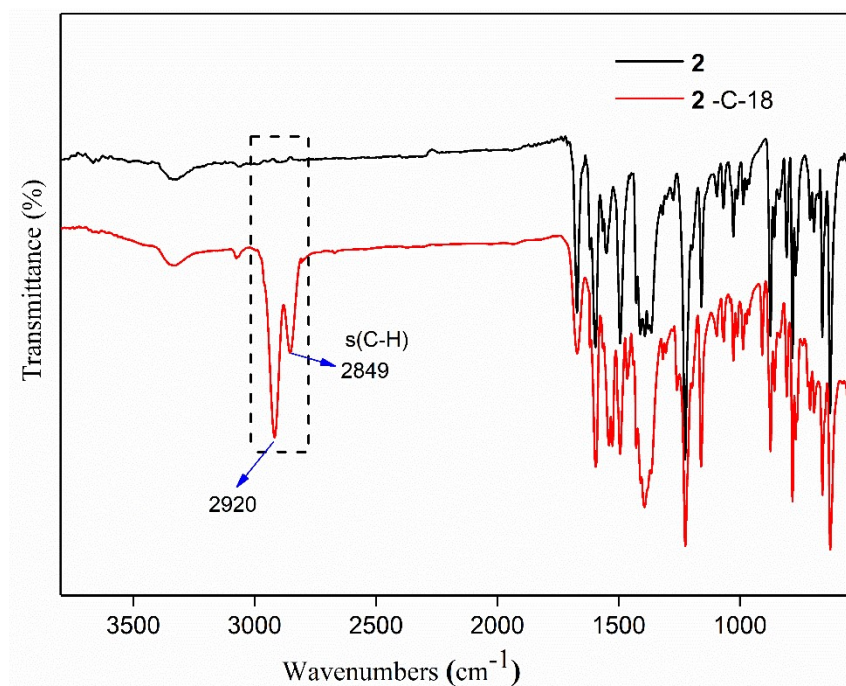



**Fig. S28** TGA curves for activated **2a** (black) and **2a-C18** (red).

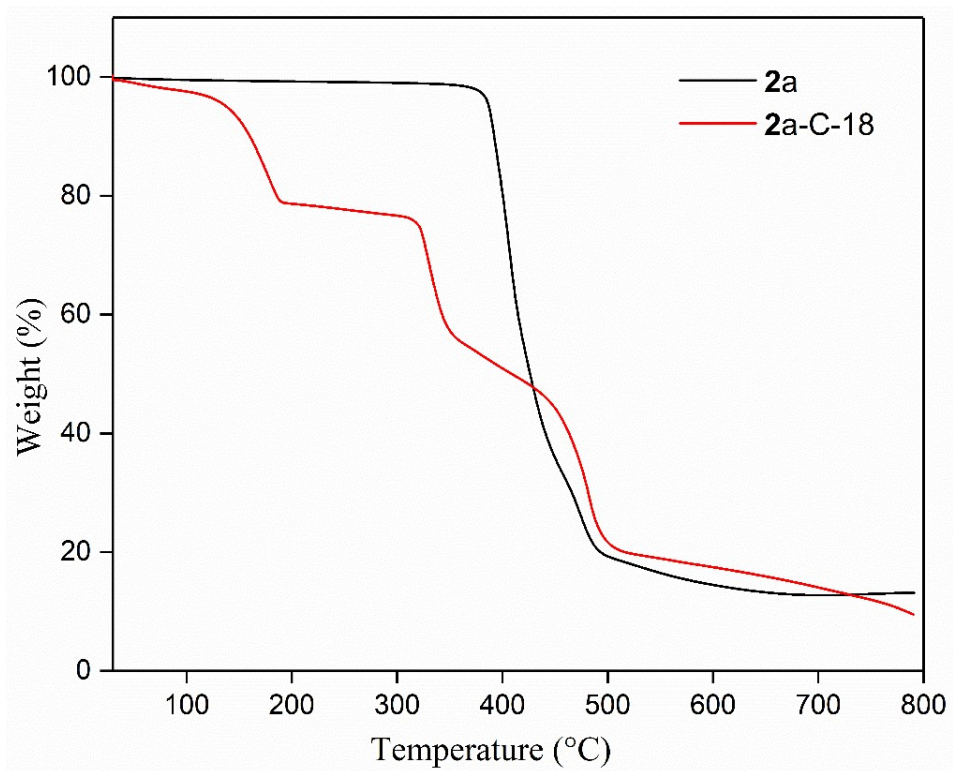

**Fig. S29** (a) CO<sub>2</sub> uptake at 273 K for **2a** and **2a-C18**. (b) SEM images of **2** before and after post-synthesis modification.

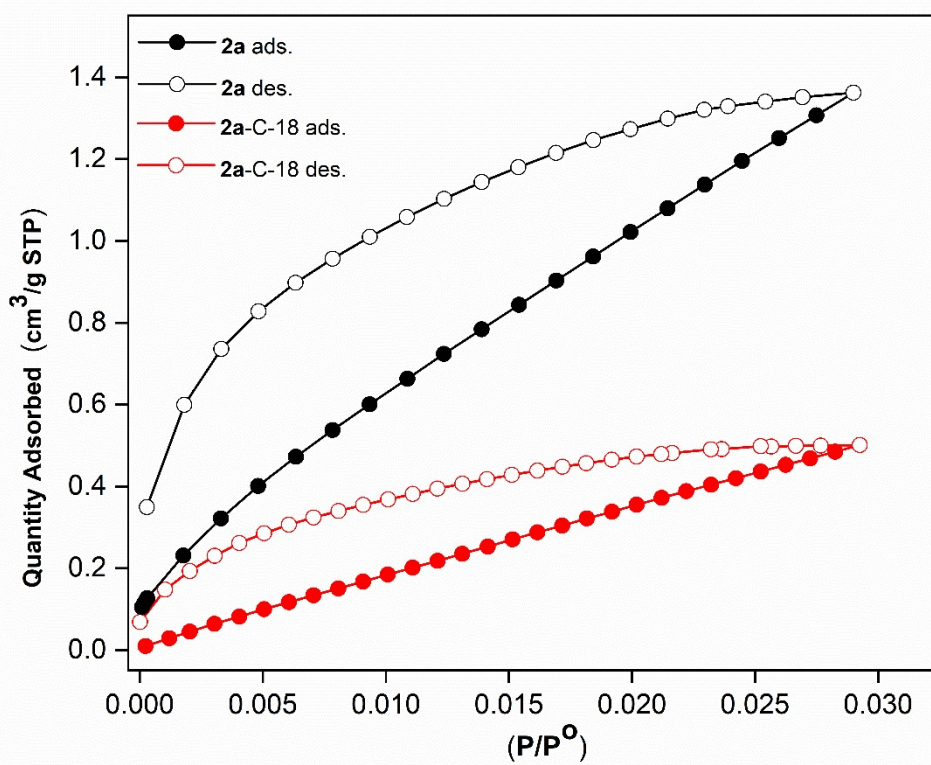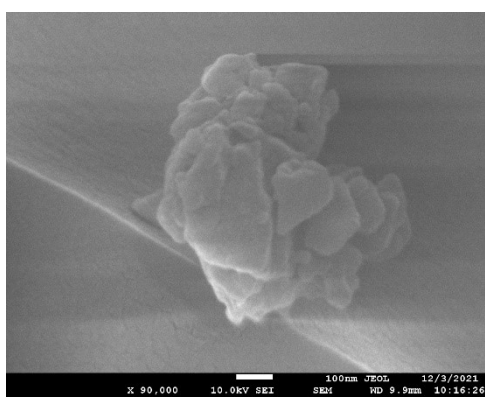

(a)

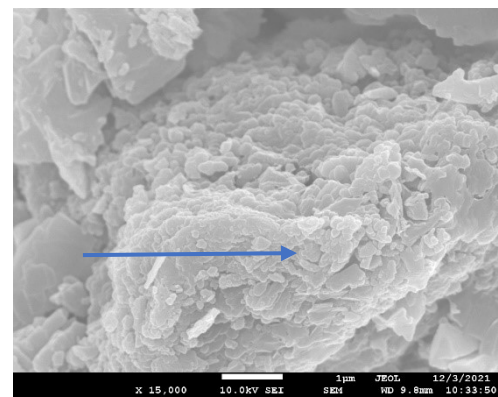

PSM

2

2-C-18

(b)

**Table S1.** Sensing properties of reported compounds towards 2,6-DCNA, and 4-NA pesticides.

| Complex                                              | Analytes                  | Stern-Volmer constant ( $K_{sv}, M^{-1}$ ) | Adjusted $R^2$     | Limit of detection ( $\mu M$ ) | Reference                                                   |
|------------------------------------------------------|---------------------------|--------------------------------------------|--------------------|--------------------------------|-------------------------------------------------------------|
| $\{[Zn(L^1)_{0.5}(FIPBB) \cdot H_2O]\}_n$ , <b>1</b> | 2,6-DCNA,                 | $1.136 \times 10^4$                        | 0.981              | 3.62                           | this work                                                   |
|                                                      | 4-NA                      | $1.313 \times 10^4$                        | 0.992              | 4.14                           |                                                             |
| $\{[Zn(L^2)(OBA) \cdot CH_3OH]\}_n$ , <b>2</b>       | 2,6-DCNA,                 | $2.025 \times 10^5$                        | 0.988              | 2.86                           | this work                                                   |
|                                                      | 4-NA                      | $2.623 \times 10^5$                        | 0.992              | 1.94                           |                                                             |
| Mg-APDA                                              | 2,6-DCNA                  | $7.50 \times 10^4$                         | 0.9815             | 1.50                           | <i>Inorg. Chem.</i> 2018, 57, 21, 13330–13340.              |
| $[Zn(L)_2(DMF)_4] \cdot 2BF_4^-$                     | 2,6-DNA,                  | $6.401 \times 10^4$                        | 0.995              | 2.97                           | Chem Asian. J. 2022, 17, 202101204.                         |
| $[Cd(L)_2(Cl)_2] \cdot 2H_2O$                        | 4-NA                      | $7.130 \times 10^4$                        | 0.919              | 0.90                           |                                                             |
| $(H_3O)[Zn_2L(H_2O)] \cdot 3NMP \cdot 6H_2O$         | 2,6-DCNA                  | $6.072 \times 10^3$                        | 0.922              | 5.4                            | RSC Adv., 2019, 9, 38469-38476.                             |
| $[Eu_2(dtztp)(OH)_2(DMF)(H_2O)_{2.5}] \cdot 2H_2O$   | 2,6-DCNA                  | $6.25 \times 10^4$                         | 0.995              | 2.91                           | Sensors and Actuators: B. Chemical, 2021, 331, 129377.      |
| $[Ag(3-dpyb)(H_3odpa)] \cdot H_2O$                   | 2,6-DCNA                  | $2.028 \times 10^5$                        | 0.988              | 1.15                           | RSC Adv., 2020, 10, 44712–44718.                            |
| $\{[Cd(tptc)_{0.5}(bpz)(H_2O)] \cdot 0.5H_2O\}_n$    | 2,6-DCNA                  | $4.71 \times 10^4$                         | 0.989              | 1.14                           | Molecular and Biomolecular Spectroscopy, 2020, 239, 118467. |
|                                                      | $[Cd(tptc)_{0.5}(bpy)]_n$ | 2,6-DCNA                                   | $8.27 \times 10^3$ | 0.994                          |                                                             |
| $[Zn_2(bpdc)_2(BPyTPE)]$                             | 2,6-DCNA                  | $8.04 \times 10^3$                         | 0.996              | 1.30                           | Chem. Commun., 2017, 53, 9975-9978.                         |
| $[Cd_3(L^2)_2(H_2O)_4] \cdot 5H_2O$ (4)              | 4-NA                      | $2.15 \times 10^4$                         | 0.998              | 1.14                           | Cryst. Growth Des. 2018, 18, 431–440.                       |
| $[Cd(ppvppa)(1,4-NDC)]_n$ (10)                       | 4-NA                      | $1.3 \times 10^3$                          | 0.985              | 1.20                           | Cryst. Growth Des. 2015, 15, 2753–2760.                     |
| $[Cd(tptc)_{0.5}(phen)]$                             | 2,6-DCNA                  | $5.18 \times 10^4$                         |                    | 1.02                           | New J. Chem., 2019, 43, 13349-13356.                        |
| $[Zn_3(DDB)(DPE)]$                                   | 2,6-DCNA                  | $3.3 \times 10^4$                          | 0.990              | 3.3                            | Dalton Trans., 2019, 48, 16776-16785.                       |
| LNU-45                                               | 2,6-DCNA                  | $9.09 \times 10^4$                         | 0.998              | 1.5                            | Molecules, 2022, 27, 126.                                   |
| LNU-47                                               | 2,6-DCNA                  | $1.62 \times 10^3$                         | 0.992              | 1.9                            |                                                             |
